# Supplementary material
Source: PubMed Central journal article supplement (PMC4406275)
Supplement: NIHMS679076-supplement-Supplementary.pdf [file NIHMS679076-supplement-Supplementary.pdf]

**SUPPLEMENTARY MATERIALS**

**Supplementary Fig. 1 to 14**

**Supplementary Table 1 to 4**

## SUPPLEMENTARY FIGURE AND TABLE LEGENDS

### **Supplementary Fig. 1. Characterization of the doxycycline inducible THP-1 cell lines. (a)**

Schematic diagram of the lentiviral vector (pTRIPZ) used to construct the inducible cell lines. Abbreviations: TRE, Tet-responsive element; T2A, 2A sequence from *Thosea asigna*; GFP, green fluorescent protein; UBC, Ubiquitin C promoter; rtTA3, reverse tetracycline-transactivator 3; IRES, internal ribosomal entry site; Puro<sup>R</sup>, puromycin resistance gene. **(b)** Histograms showing GFP fluorescence of the inducible cell lines in the absence and presence of doxycycline (2 ug/mL) after 3 days of induction. The data shown is representative of 4 independent experiments. **(c)** Western blot for the 2A peptide tagged to the C-terminus of IDH1 in lysates generated from the inducible cell lines without or with doxycycline induction for 4 days.  $\beta$ -actin levels were probed as loading controls. The data shown is representative of 2 independent experiments. **(d)** Intracellular flow cytometry staining for mutant IDH1 R132H expression in the inducible cell lines after 3 days of induction. The data shown is representative of 3 independent experiments. **(e)** Measurement of intracellular 2-HG levels in the inducible cell lines after 7 days of induction with doxycycline. The signal intensity of 2-HG was normalized to the glutamate peak for each sample. The data shown represents the fold-increase in normalized 2-HG levels relative to the uninduced sample.

### **Supplementary Fig. 2. Measurement of the degree of BCL-2 knockdown by lentiviral**

**shRNA vectors using intracellular flow cytometry.** Intracellular flow cytometry staining for BCL-2 expression in THP-1 cells 8 days following transduction with the indicated shRNA lentiviral vectors. The red histograms represent non-specific staining with an isotype control antibody (mouse IgG1, kappa) conjugated to BD Horizon V450. The blue histograms represent

specific BCL-2 staining. The degree of knockdown (k/d) is shown on the top right of each panel. The data shown is representative of two independent experiments.

**Supplementary Fig. 3. Mutant IDH2 expression and octyl-(R)-2-HG treatment increase sensitivity to ABT-199 in AML cell lines and cord blood CD34<sup>+</sup> HSPCs.** (a) Parental THP-1 cells were transduced with lentiviral vectors that constitutively expressed WT IDH2, mutant IDH2 R140Q, or mutant IDH2 R172K. Four days after transduction, transduced (GFP<sup>+</sup>) cells were FACS-purified and treated with serial dilutions of ABT-199 at the indicated concentrations. Cell viability was determined by Annexin V staining 3 days after treatment and was normalized to the untreated control sample. The data shown are the means of three biological replicates with errors bars showing standard deviation. (b) Seven AML cell lines were treated with serial dilutions of ABT-199 at the indicated concentrations in the absence or presence of octyl-(R)-2-HG (650 $\mu$ M for KG-1, 750 $\mu$ M for TF-1, 700 $\mu$ M for OCI-AML3, 650 $\mu$ M for HEL, 400 $\mu$ M for U937, 550 $\mu$ M for NB4, and 400 $\mu$ M for Kasumi-1). Cell viability was determined by Annexin V staining 1-2 days after ABT-199 treatment and was normalized to the untreated control sample. The data shown are the means of three biological replicates with errors bars showing standard deviation. (c) CD34<sup>+</sup> enriched cord blood HSPCs were exposed to octyl-(R)-2-HG at 600 $\mu$ M or PBS (untreated control) and ABT-199 at 500nM. Cell viability was determined by Annexin V staining 2 days after ABT-199 treatment. Data shown is representative of three independent biological replicates. (d) Treatment with octyl-(R)-2-HG fails to sensitize AML cells to doxorubicin and cytarabine. THP-1 or KG-1 cells were exposed to octyl-(R)-2-HG at the indicated concentrations or PBS (untreated control) and serial dilutions of doxorubicin or cytarabine at the indicated concentrations. Cell viability was determined by Annexin V staining 2

or 3 days after treatment with the cytotoxic agents. The data shown is from one set of experiments.

**Supplementary Fig. 4. FACS-sorting strategy for the viable blast population in primary human AML samples.** See Online Methods for details.

**Supplementary Fig. 5. Effect of ABT-199 treatment on hematologic parameters and weight of human AML engrafted NSG mice.** Weight and complete blood counts (CBC) were determined before and after 7 days of treatment with ABT-199. The data shown represent the percentage change relative to pre-treatment baseline values. Each data point represents an individual animal. The horizontal line represents the mean of each group with error bars indicating standard deviation. Abbreviations: N.S. non-significant.

**Supplementary Fig. 6. Improved survival of primary recipients treated with ABT-199 and secondary recipients transplanted with bone marrow cells collected from ABT-199 treated primary recipients.** (a) Kaplan-Meier survival curves of primary NSG recipients engrafted with the indicated samples following mock or ABT-199 treatment. The treatment period is as indicated on each graph. n=4 for each treatment group. (b) Kaplan-Meier survival curves of secondary transplant recipients of bone marrow cells from vehicle or ABT-199-treated NSG mice engrafted with the indicated samples. n=5 for each treatment group.

**Supplementary Fig. 7. (a) Increase in BCL-2 dependence is not correlated with changes in expression of BCL-2 family members.** Left panel: Parental THP-1 cells were treated with

octyl-(R)-2-HG (300 $\mu$ M) for 48 hours. Whole cell lysates were prepared from the treated cells and probed for expression of the indicated proteins by Western blot.  $\beta$ -actin levels were probed as loading controls. The data shown is representative of two independent experiments. **Right panel:** The indicated inducible THP-1 cell lines were treated with doxycycline at 2 $\mu$ g/mL for 4 days. Whole cell lysates prepared from the induced cells and untreated control cells were probed for expression of the indicated proteins by Western blot.  $\beta$ -actin levels were probed as loading controls. Western blot for the 2A peptide tagged to the C-terminus of IDH1 in lysates was performed to confirm cDNA expression. The data shown is representative of two independent experiments. **(b) Treatment with antioxidants fails to rescue the synthetic lethal phenotype.** Parental THP-1 cells were exposed to the indicated antioxidants and treated with DMSO or ABT-199 (200nM) in the absence or presence of octyl-(R)-2-HG at 300 $\mu$ M. Viability was determined by annexin V staining 24 hours after treatment. The concentrations used for each antioxidant were as follows: ebselen, 20 $\mu$ M; glutathione monoethyl ester, 10mM; MnTBAP, 100 $\mu$ M; MnTMPyP, 100 $\mu$ M; NAC (N-acetylcystine), 10mM; PEG-CAT (PEGylated-catalase) 500U/mL; PEG-SOD (PEGylated-superoxide dismutase) 100U/mL; TEMPOL, 1mM; Tiron, 1mM; and Trolox, 200 $\mu$ M.

**Supplementary Fig. 8. (a) (S)-2-HG fails to accelerate the collapse of  $\Delta\Psi_{\text{mito}}$  upon ABT-199 treatment.** Intact functional mitochondria were isolated from THP-1 cells and incubated with the indicated treatments and JC-1. Kinetic changes in JC-1 fluorescence were measured and reported as JC-1 fluorescence values normalized to the maximum for each condition. The data shown are representative of three independent experiments. **(b) (R)-2-HG does not inhibit complex V activity.** Enzymatic activity of complex V of the electron transport chain (ETC) was

determined in the presence of (R)-2-HG at 10mM. The data shown are the means of three biological replicates with error bars showing standard deviation. Abbreviations: n.s., not significant.

**Supplementary Fig. 9. The (R)-enantiomer of 2-HG alters the absorbance spectrum of reduced COX and the changes are reversible with cyanide treatment.** (a) The absorbance spectrum in the Soret region (390nm to 490nm) of oxidized or reduced COX was measured after the addition of either (R)-2-HG, (S)-2-HG, or cyanide at the indication concentrations for 1 hour at room temperature. (b) Cyanide (10mM) or water (negative control) was added to a solution of reduced COX pre-incubated with (R)-2-HG. After a 1-hour incubation at room temperature, the absorbance spectrum was again measured. The data shown are representative of two independent experiments.

**Supplementary Fig. 10. COX activity is suppressed in THP-1 cells exposed to octyl-(R)-2-HG.** (a) THP-1 cells were pre-treated with octyl-(R)-2-HG at 350 $\mu$ M for 3 days or PBS as untreated control. The oxygen consumption rates (OCR) of the cells were then serially measured using the Seahorse extracellular flux analyzer at baseline and following injection of carbonyl cyanide-4-(trifluoromethoxy)phenylhydrazone (FCCP), antimycin A (AA), *N,N,N',N'*-tetramethyl-*p*-phenylenediamine/sodium ascorbate (TMPD/A), and sodium azide (NaN<sub>3</sub>) into the analysis well. Error bars represent standard deviations derived from technical replicates. Data shown is representative of two independent experiments. (b) THP-1 cells treated as described in (a) were stained with MitoTracker Green FM to quantify the mitochondrial mass in each condition. Data shown is representative of two independent experiments.

**Supplementary Fig. 11. Chemical inhibition of COX activity sensitizes AML cell lines to ABT-199.** KG-1 and Kasumi-1 cells were untreated or treated with sodium azide (2.5mM) or potassium cyanide (5mM) and serial dilutions of ABT-199 at the indicated concentrations. Cell viability was determined 48 hours after treatment by Annexin V staining. The data shown are the means of three biological replicates with error bars showing standard deviation.

**Supplementary Fig. 12. Knockdown of COX-IV expression reduces COX enzymatic activity.** (a) THP-1 and KG-1 cells were transduced with a non-targeting control (Ctrl) or COX-IV shRNA lentiviral vector. Whole cell lysates from FACS-sorted transduced (RFP<sup>+</sup>) cells were probed for COX-IV levels by immunoblotting with  $\beta$ -actin as loading control. The data shown is representative of two independent experiments. (b) The oxygen consumption rates (OCR) of the FACS-sorted transduced (RFP<sup>+</sup>) cells were serially measured using the Seahorse extracellular flux analyzer at baseline and following injection of (FCCP), antimycin A (AA), *N,N,N',N'*-tetramethyl-*p*-phenylenediamine/sodium ascorbate (TMPD/A), and sodium azide (NaN<sub>3</sub>) into the analysis well. Error bars represent standard deviations derived from technical replicates. Data shown is representative of three independent experiments.

**Supplementary Fig. 13. Tigecycline treatment reduces MT-CO1 levels and COX enzymatic activity.** (a) THP-1, KG-1, and Kasumi-1 cells were treated with DMSO (vehicle control) or tigecycline at 10uM (THP-1, KG-1) or 2.5uM (Kasumi-1) for 48 hours and stained for intracellular MT-CO1 expression using an Alexa Fluor 488-conjugated antibody. The data shown is representative of two independent experiments. (b) The oxygen consumption rates

(OCR) of the cells treated as described in (a) were serially measured using the Seahorse extracellular flux analyzer at baseline and following injection of (FCCP), antimycin A (AA), *N,N,N',N'*-tetramethyl-*p*-phenylenediamine/sodium ascorbate (TMPD/A), and sodium azide (NaN<sub>3</sub>) into the analysis well. Error bars represent standard deviations derived from technical replicates. Data shown is representative of three independent experiments.

**Supplementary Fig. 14. Proposed model of synthetic lethal mechanism between (R)-2-HG and BCL-2 inhibition.** Left panel: Electrons from NADH and succinate are transferred through the ETC to oxygen which is reduced to water. In the process, protons are pumped from the matrix into the intermembrane space generating the  $\Delta\Psi_{\text{mito}}$ . Middle panel: (R)-2-HG-mediated inhibition of cytochrome C oxidase (COX; complex IV) activity generates an activating signal to BAX/BAK, but their activation is blocked by BCL-2, thereby maintaining cell viability. Right panel: Simultaneous inhibition of COX by (R)-2HG and BCL-2 activity by ABT-199 permits the full activation and oligomerization of BAX/BAK resulting in MOMP, and commitment to apoptosis.

**Supplementary Table 1. List of synthetic lethal gene hits from the screen.**

**Supplementary Table 2. Clinical characteristics, cytogenetics, mutation status of FLT3, NPM1, and IDH1/2, and ABT-199 IC<sub>50</sub> of primary AML samples.** De novo AML samples were collected at the time of diagnosis. Primary refractory samples were collected after induction chemotherapy that failed to achieve a complete remission (CR). Relapsed samples were collected at the time of relapse following a morphologic CR. Progression samples were collected at the



time of progression following a partial remission with a lower-intensity regimen (e.g. hypomethylating agents). Abbreviations: MDS, myelodysplastic syndrome; CMML, chronic myelomonocytic leukemia; FAB, French American British; WHO, World Health Organization; PV, polycythemia vera; ITD, internal tandem duplication; TKD, tyrosine kinase domain.

**Supplementary Table 3. Bone marrow engraftment levels of NSG mice transplanted with primary human AML samples before and after treatment with vehicle (mock) or ABT-199 for 7 consecutive days.** \* SU430 is a mixed phenotype acute leukemia sample (B/myeloid) with variable CD33 and CD19 expression on blasts. Leukemic engraftment of SU430 was determined based on human CD45 expression alone.

**Supplementary Table 4. List of primary AML samples, IDH genotype, MT-CO1 expression level, unnormalized and normalized COX activity.**

# Supplementary Figure 1

**a**

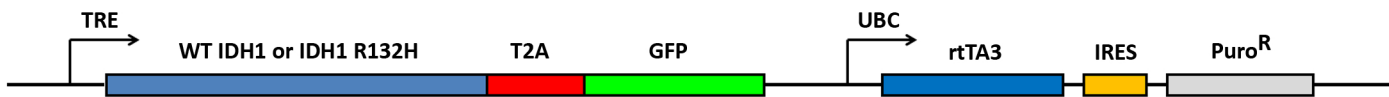

**b**

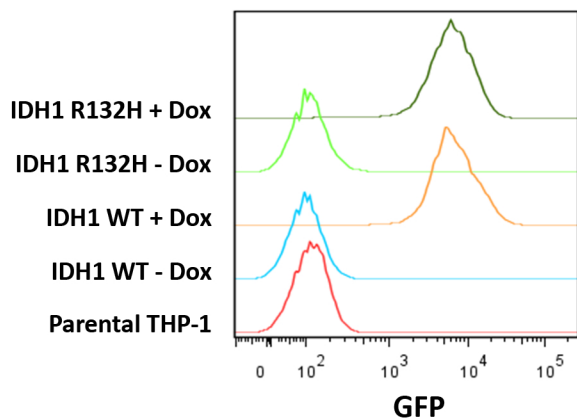

**c**

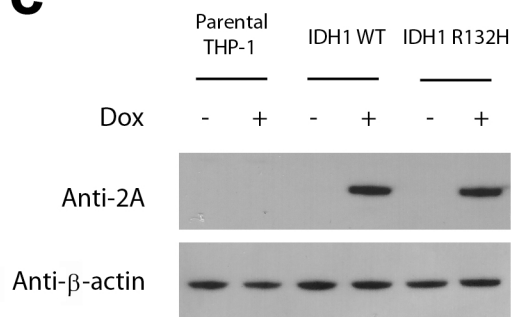

**d**

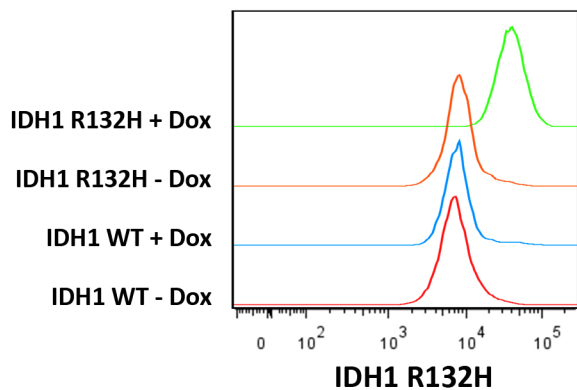

**e**

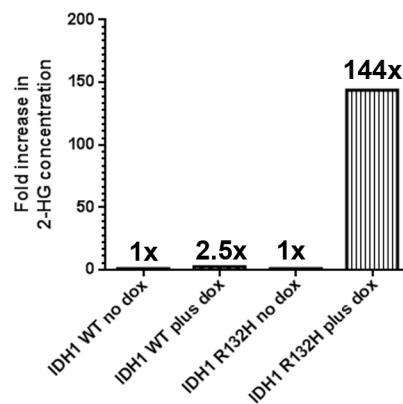

## Supplementary Figure 2

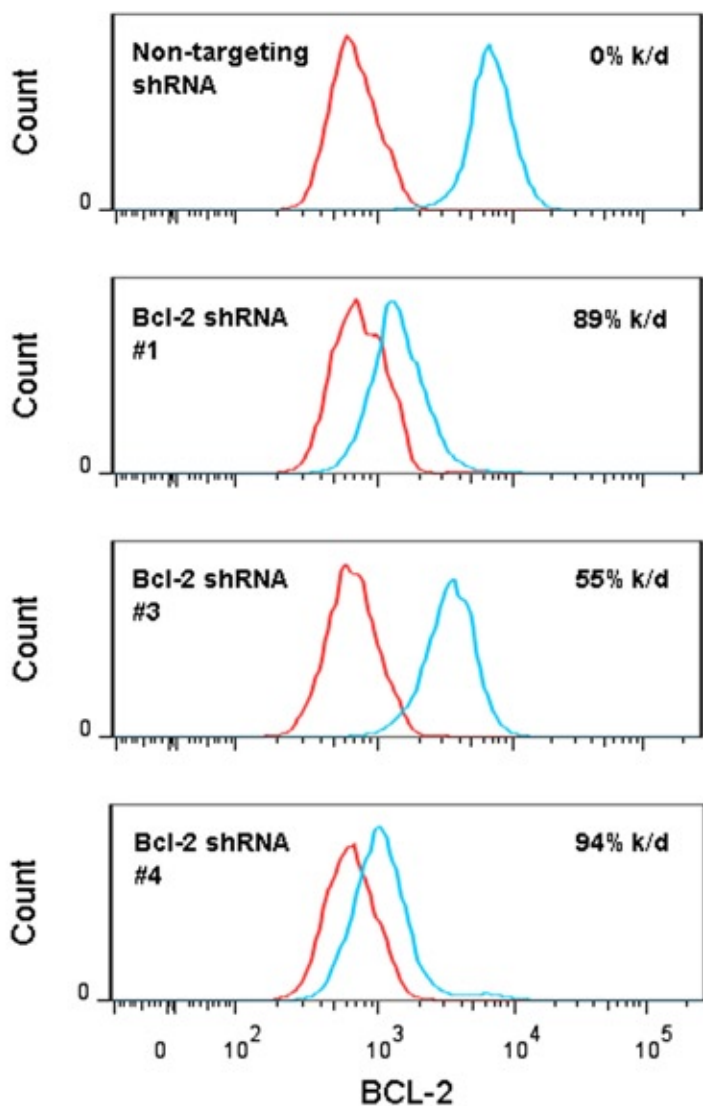

# Supplementary Figure 3

## AML cell lines

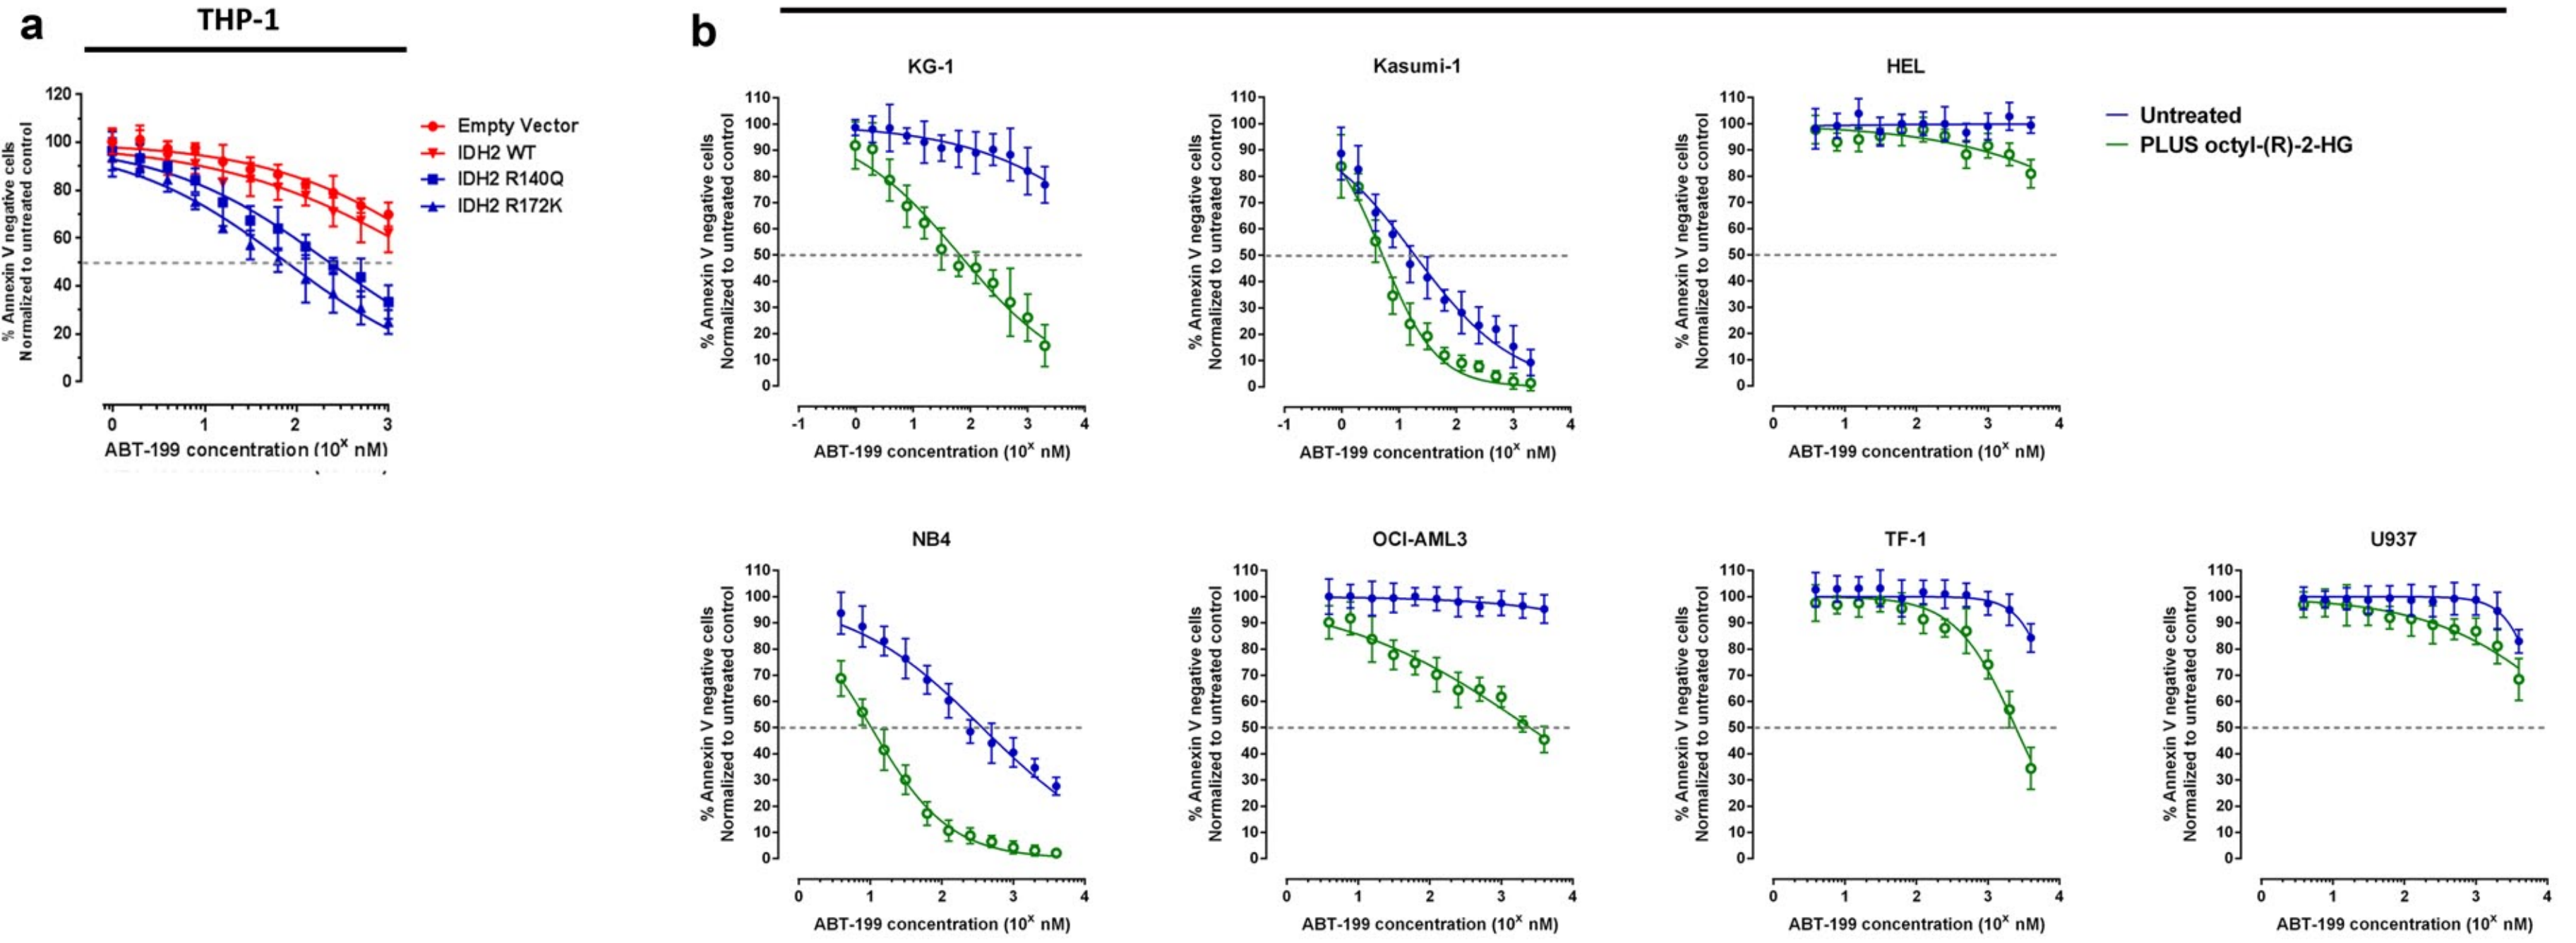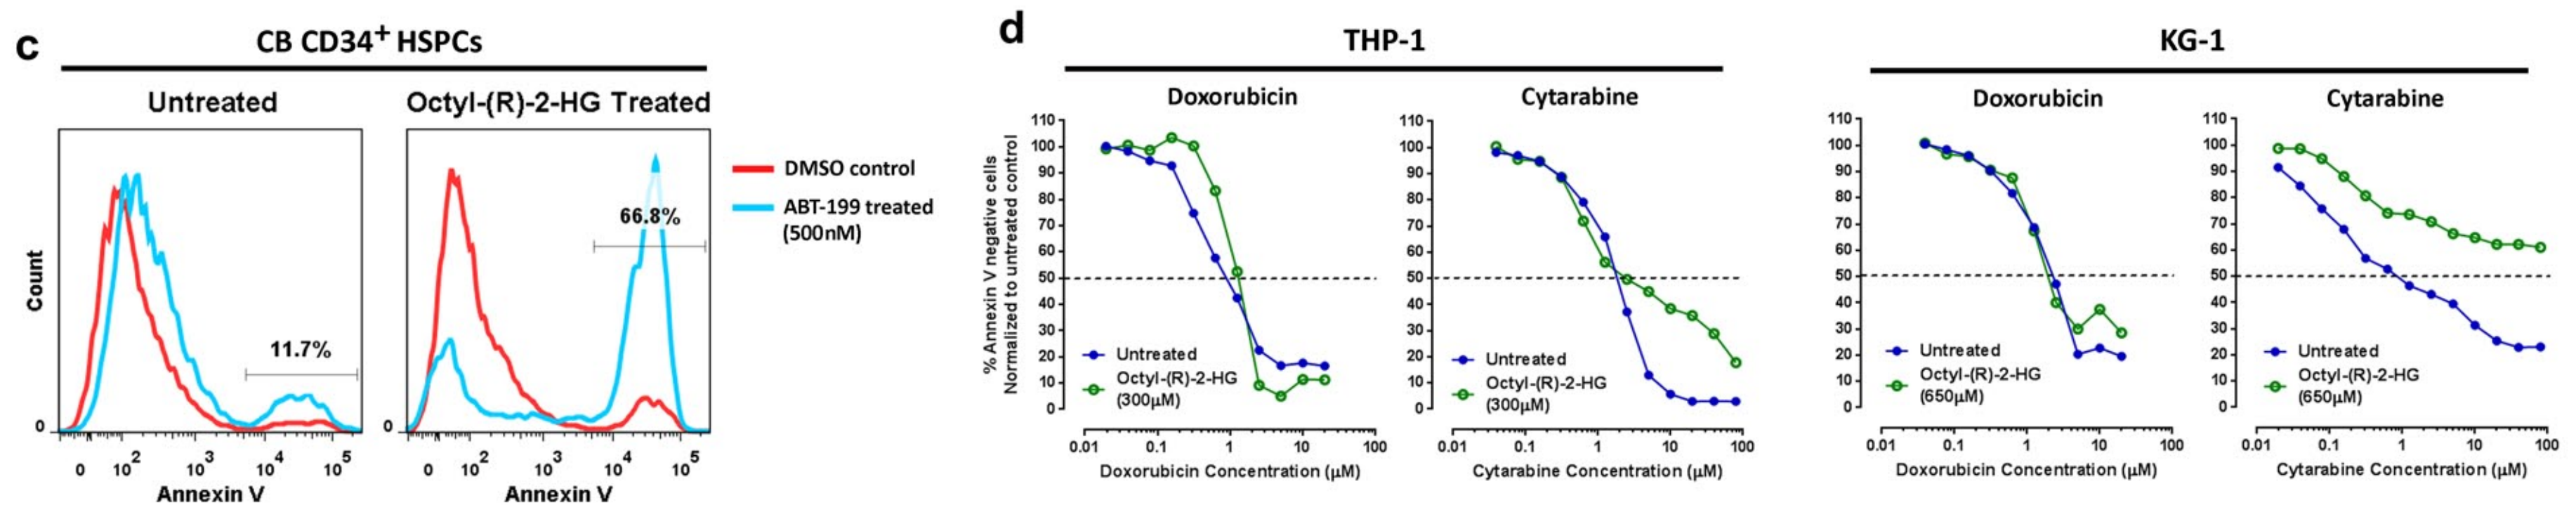

# Supplementary Figure 4

## Pre-sort

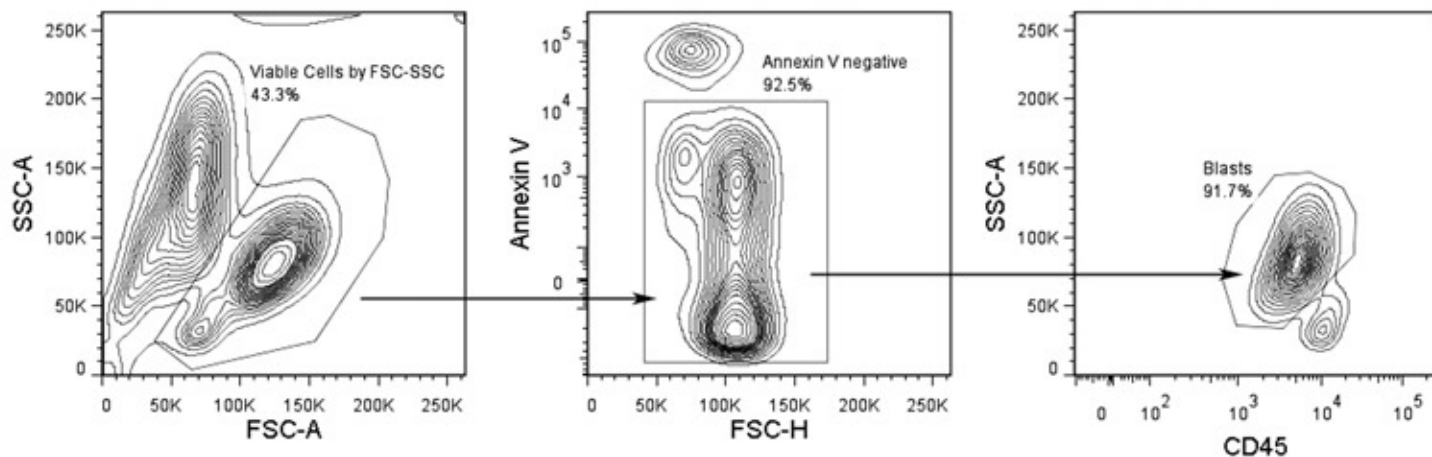

## Post-sort

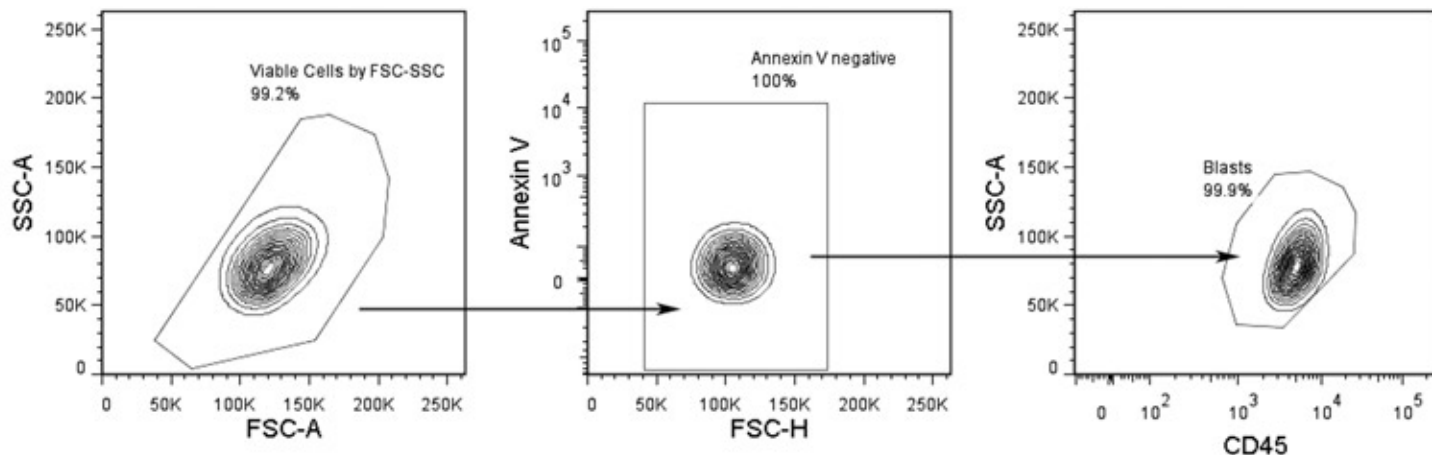

# Supplementary Figure 5

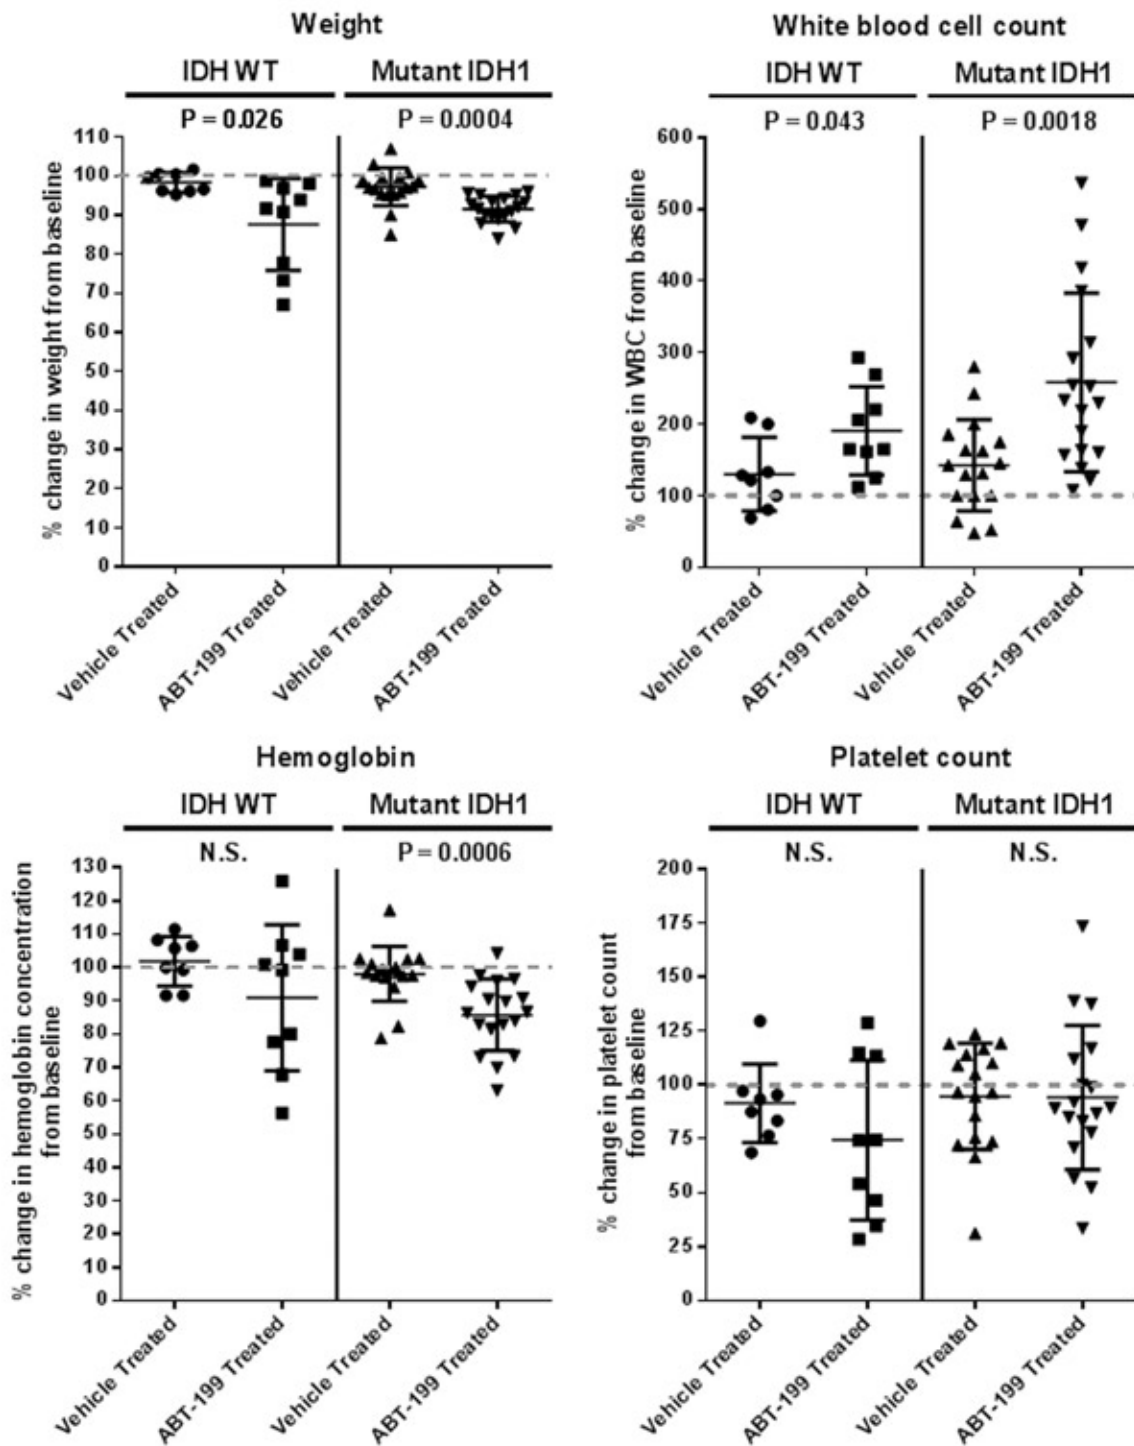

# Supplementary Figure 6

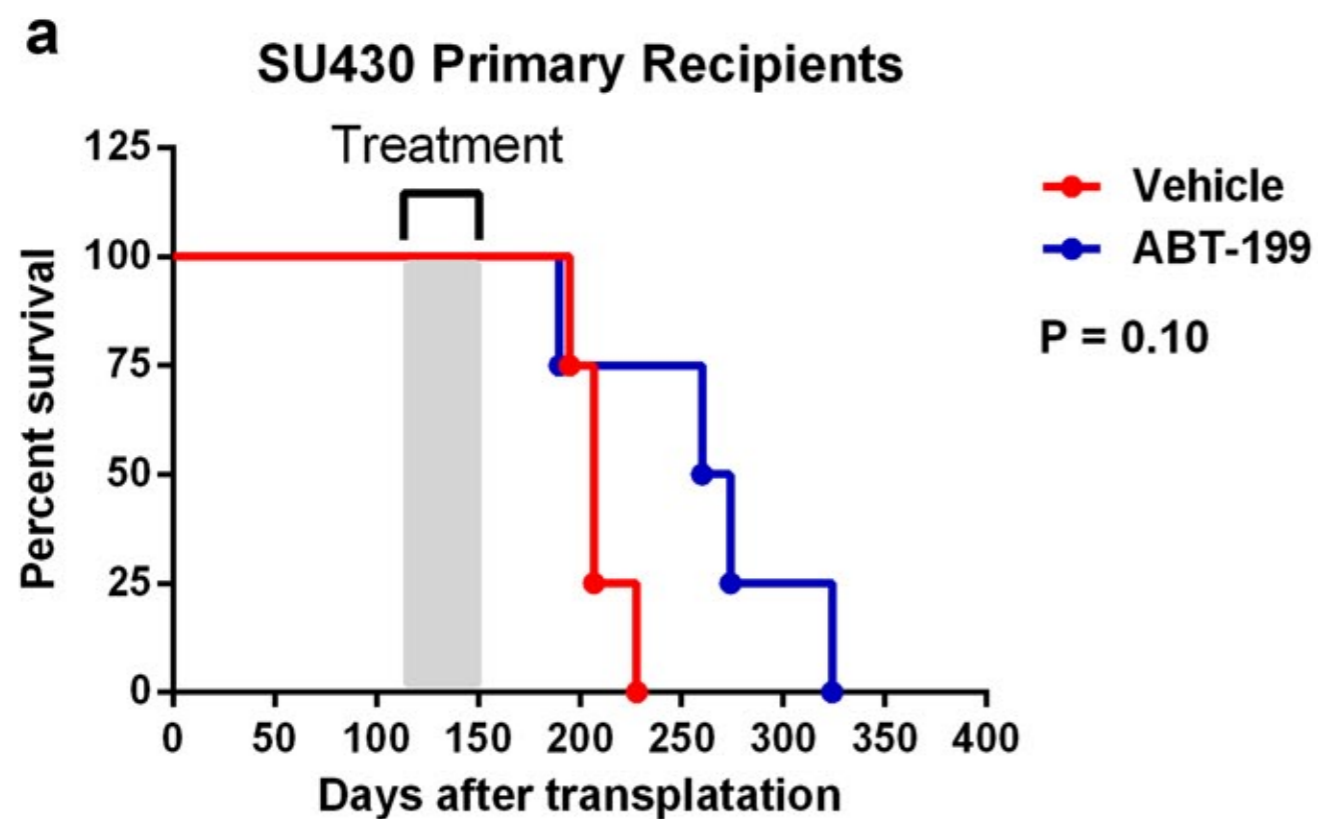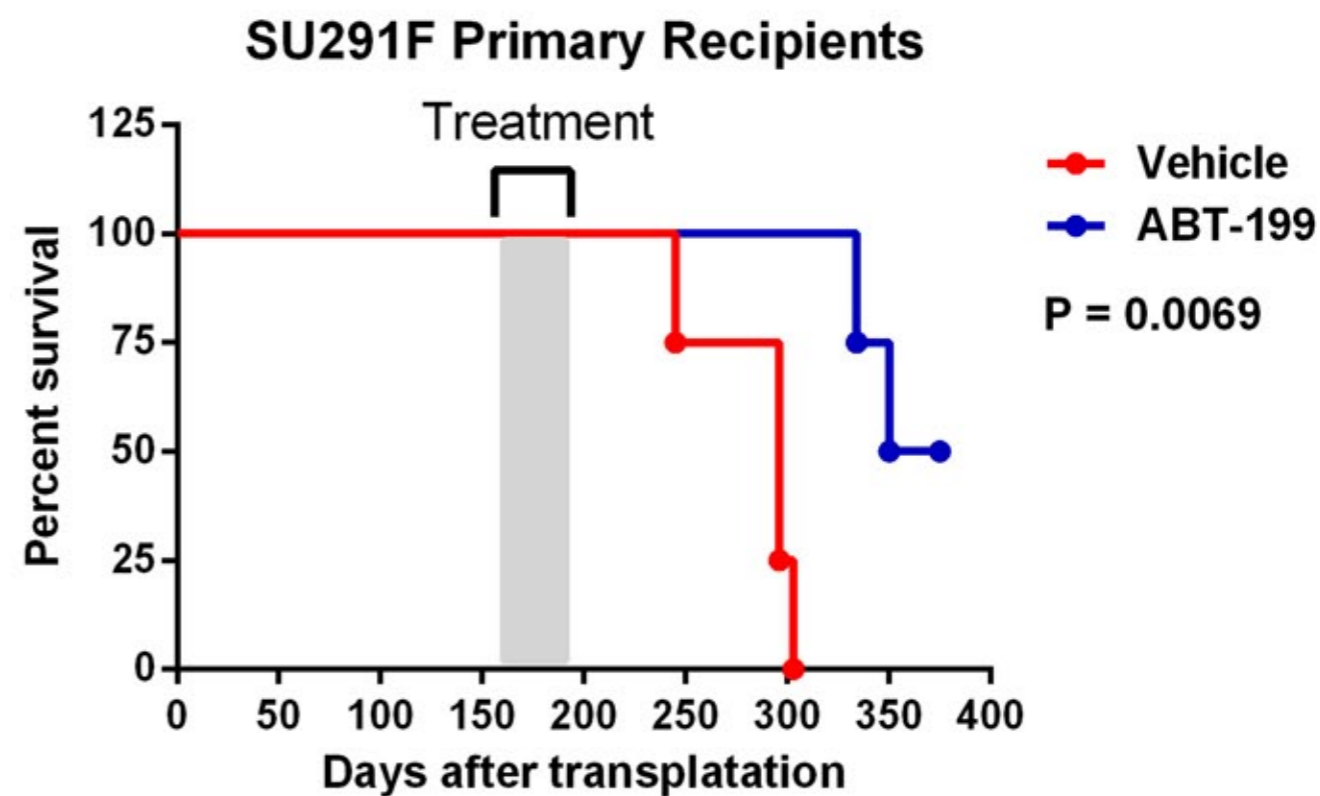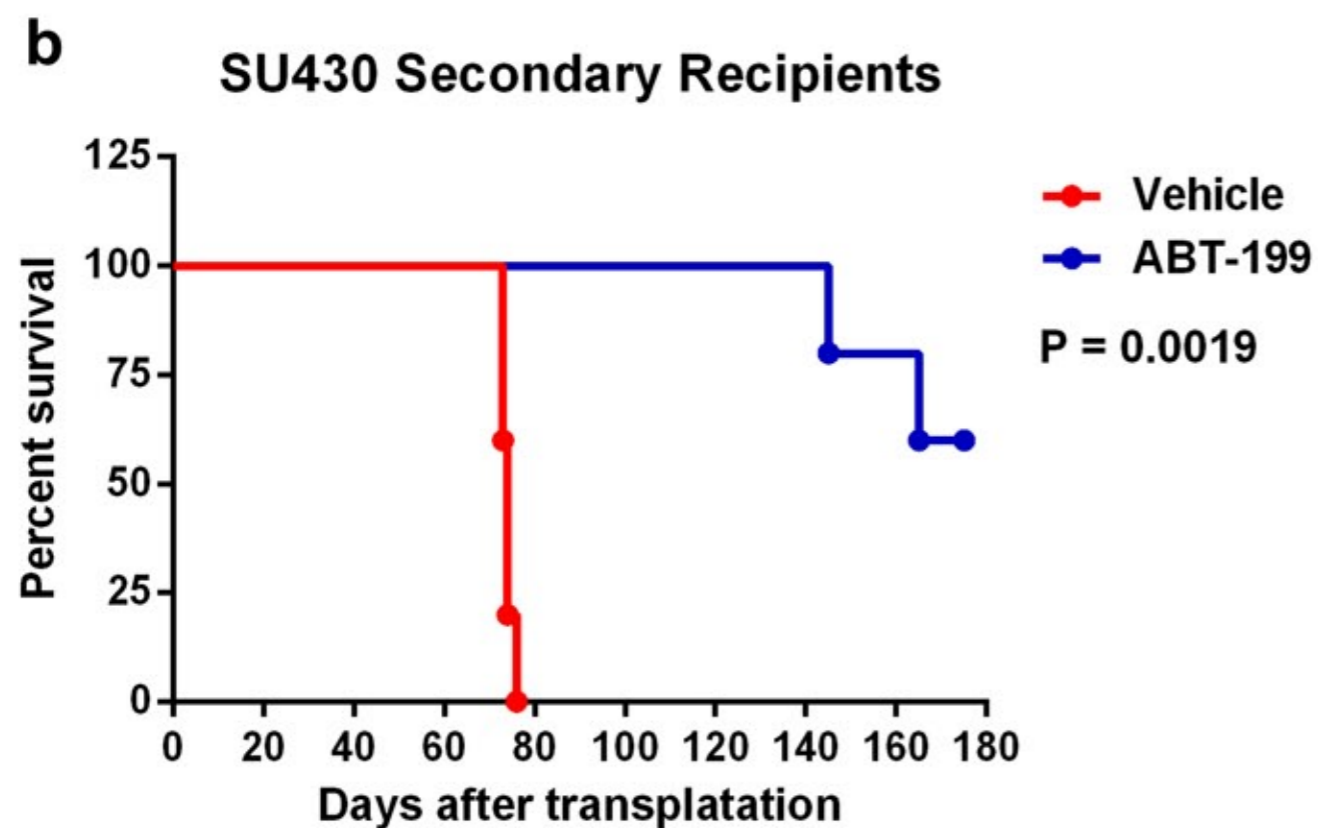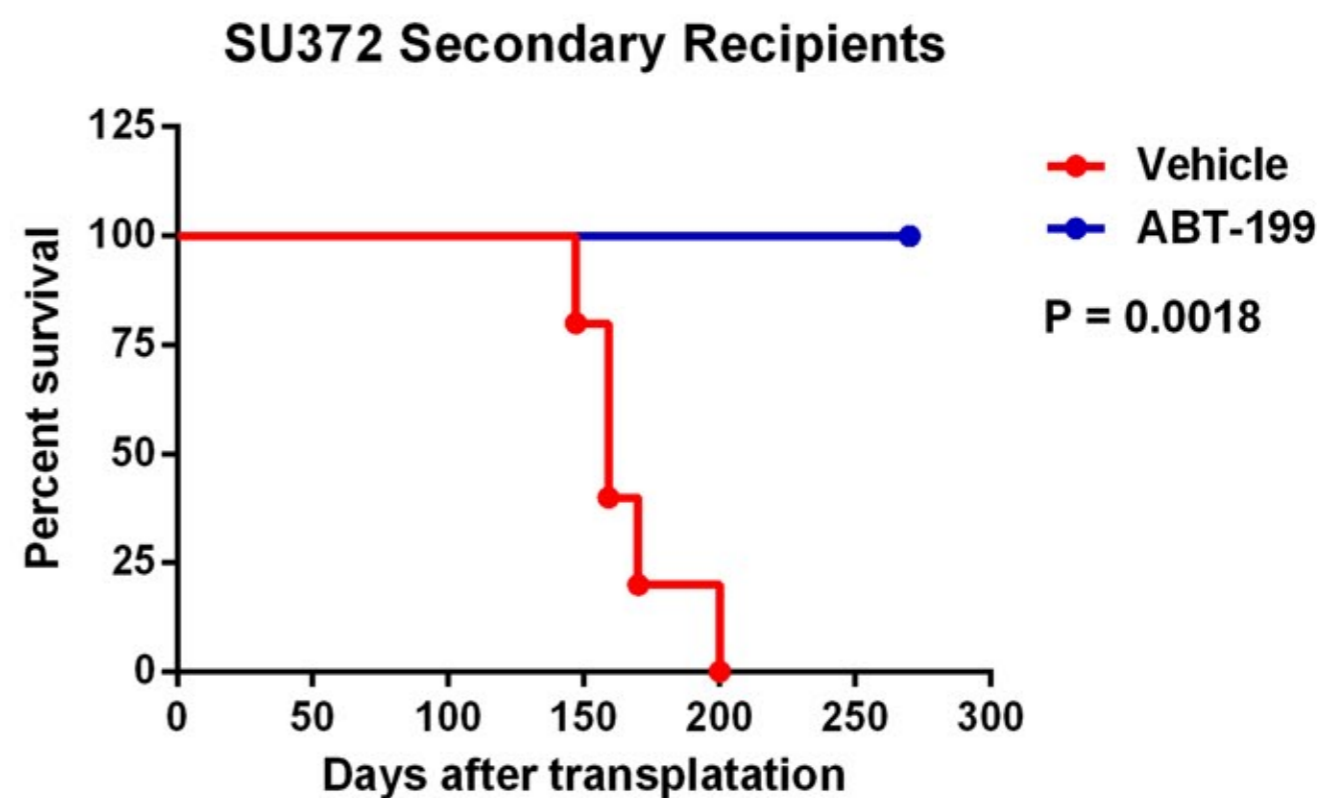

# Supplementary Figure 7

**a**

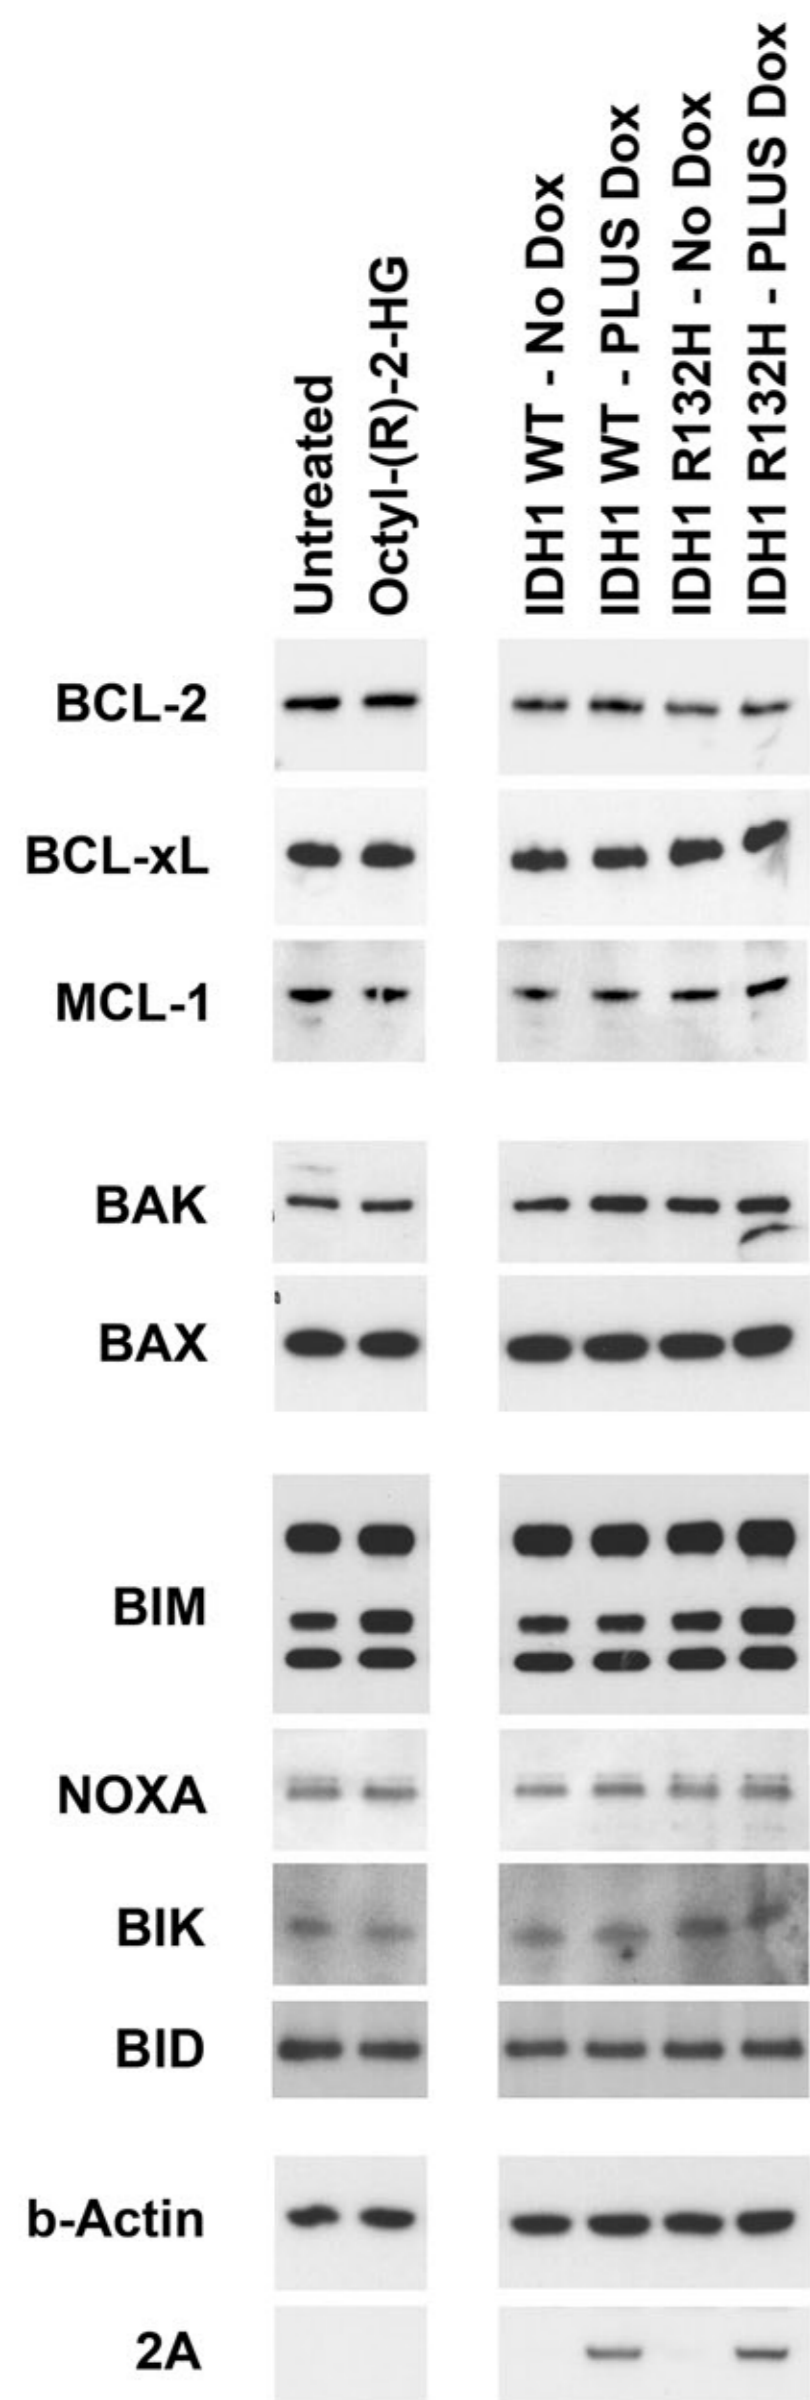

**b**

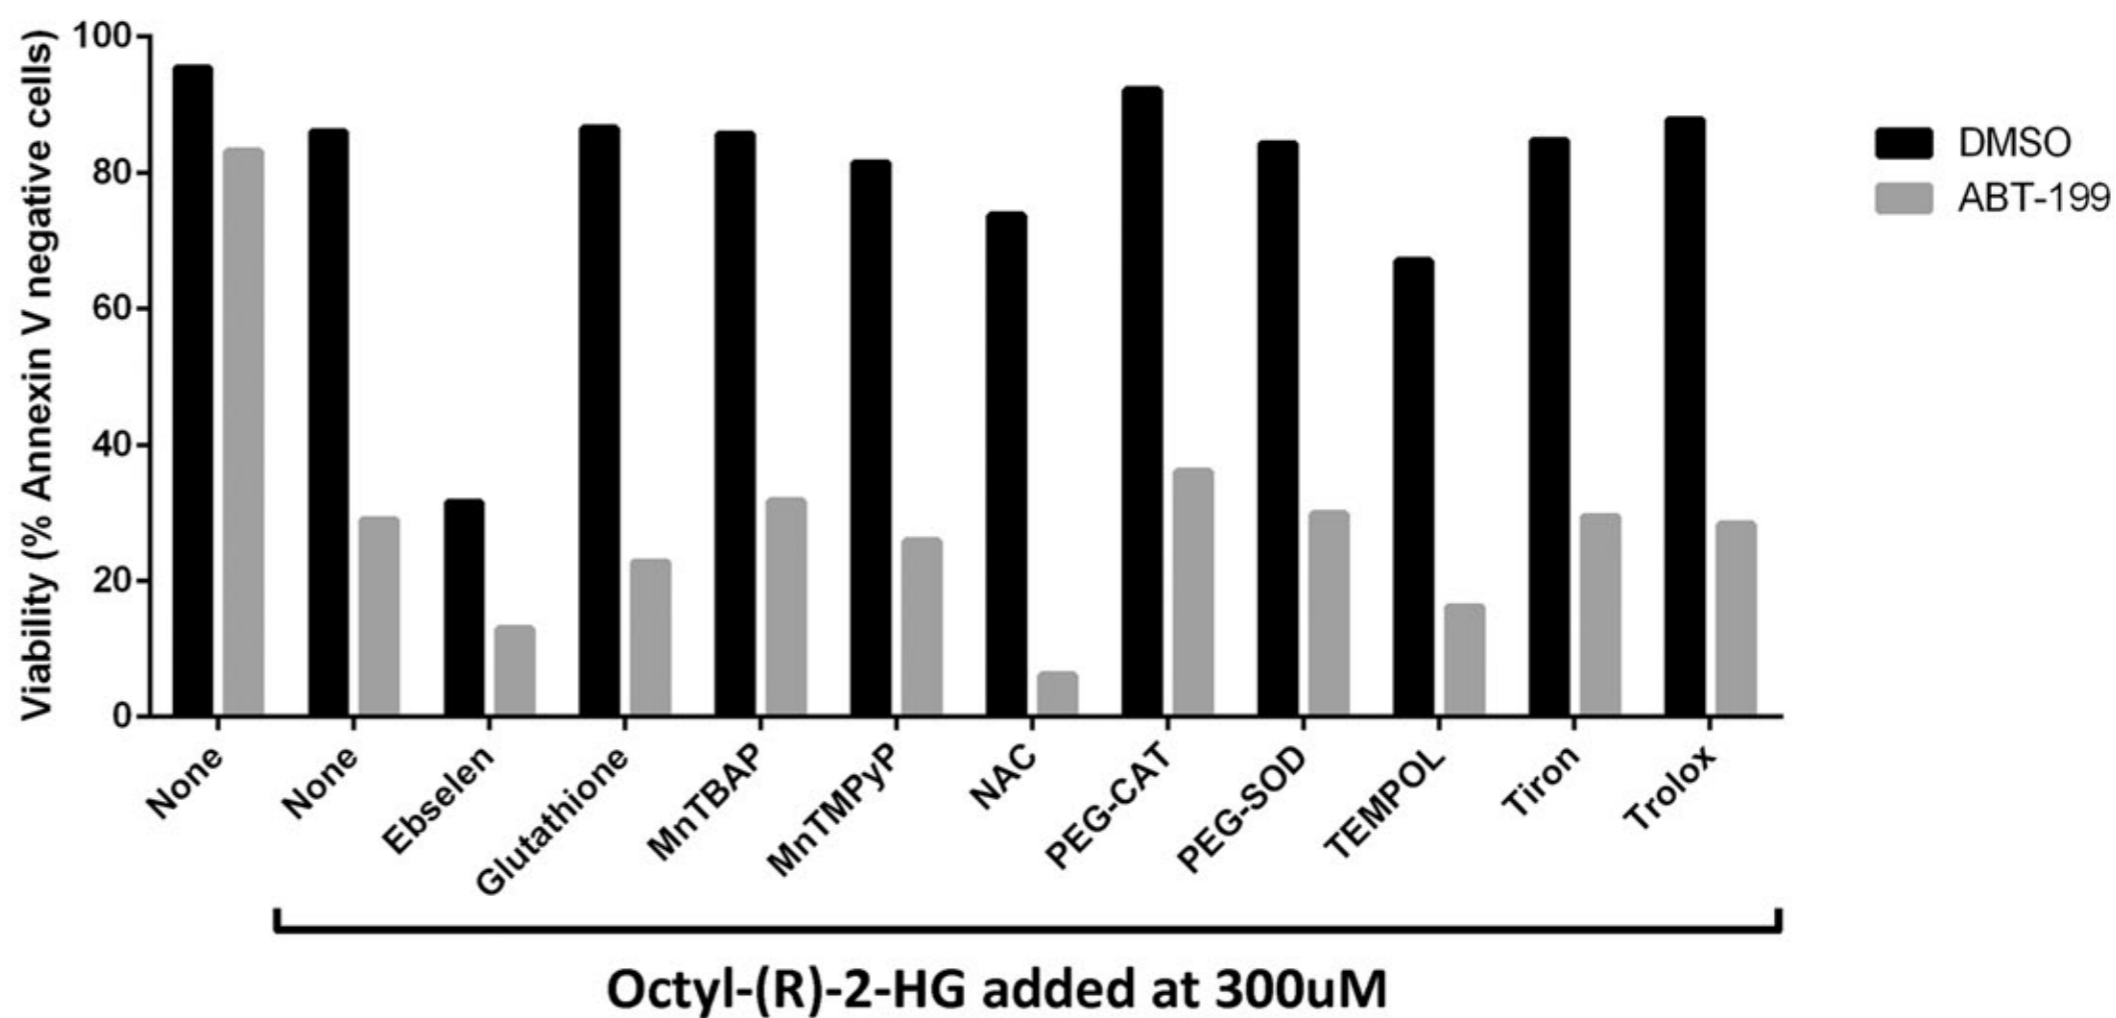



# Supplementary Figure 8

**a**

Purified Mitochondria

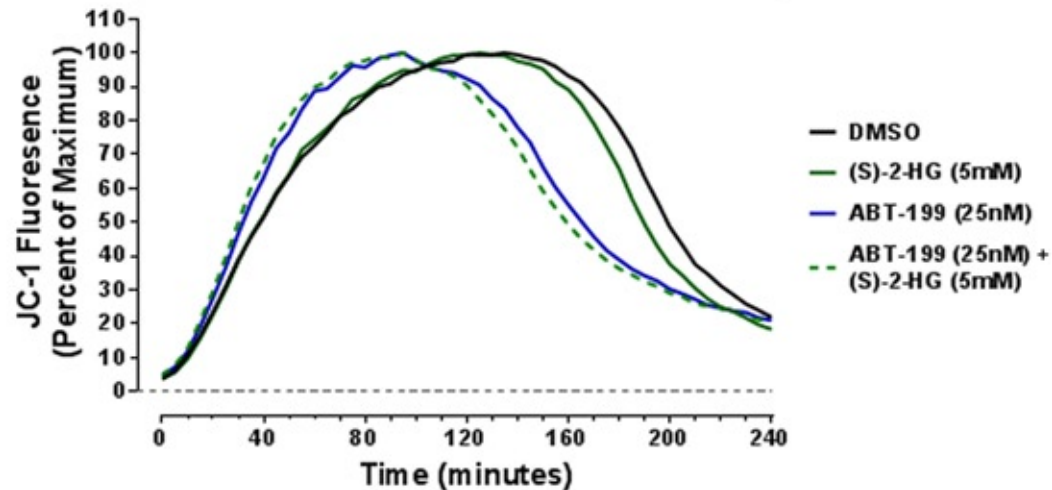

**b**

Complex V

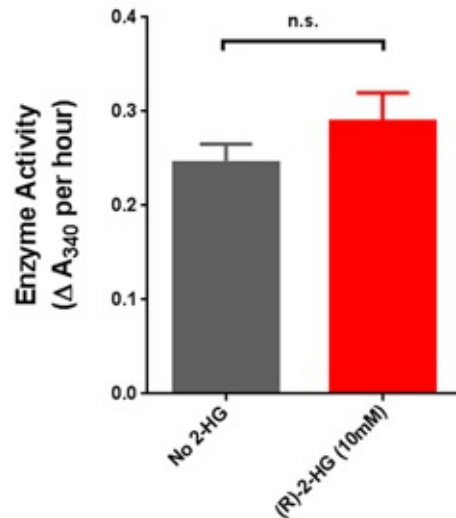

## Supplementary Figure 9

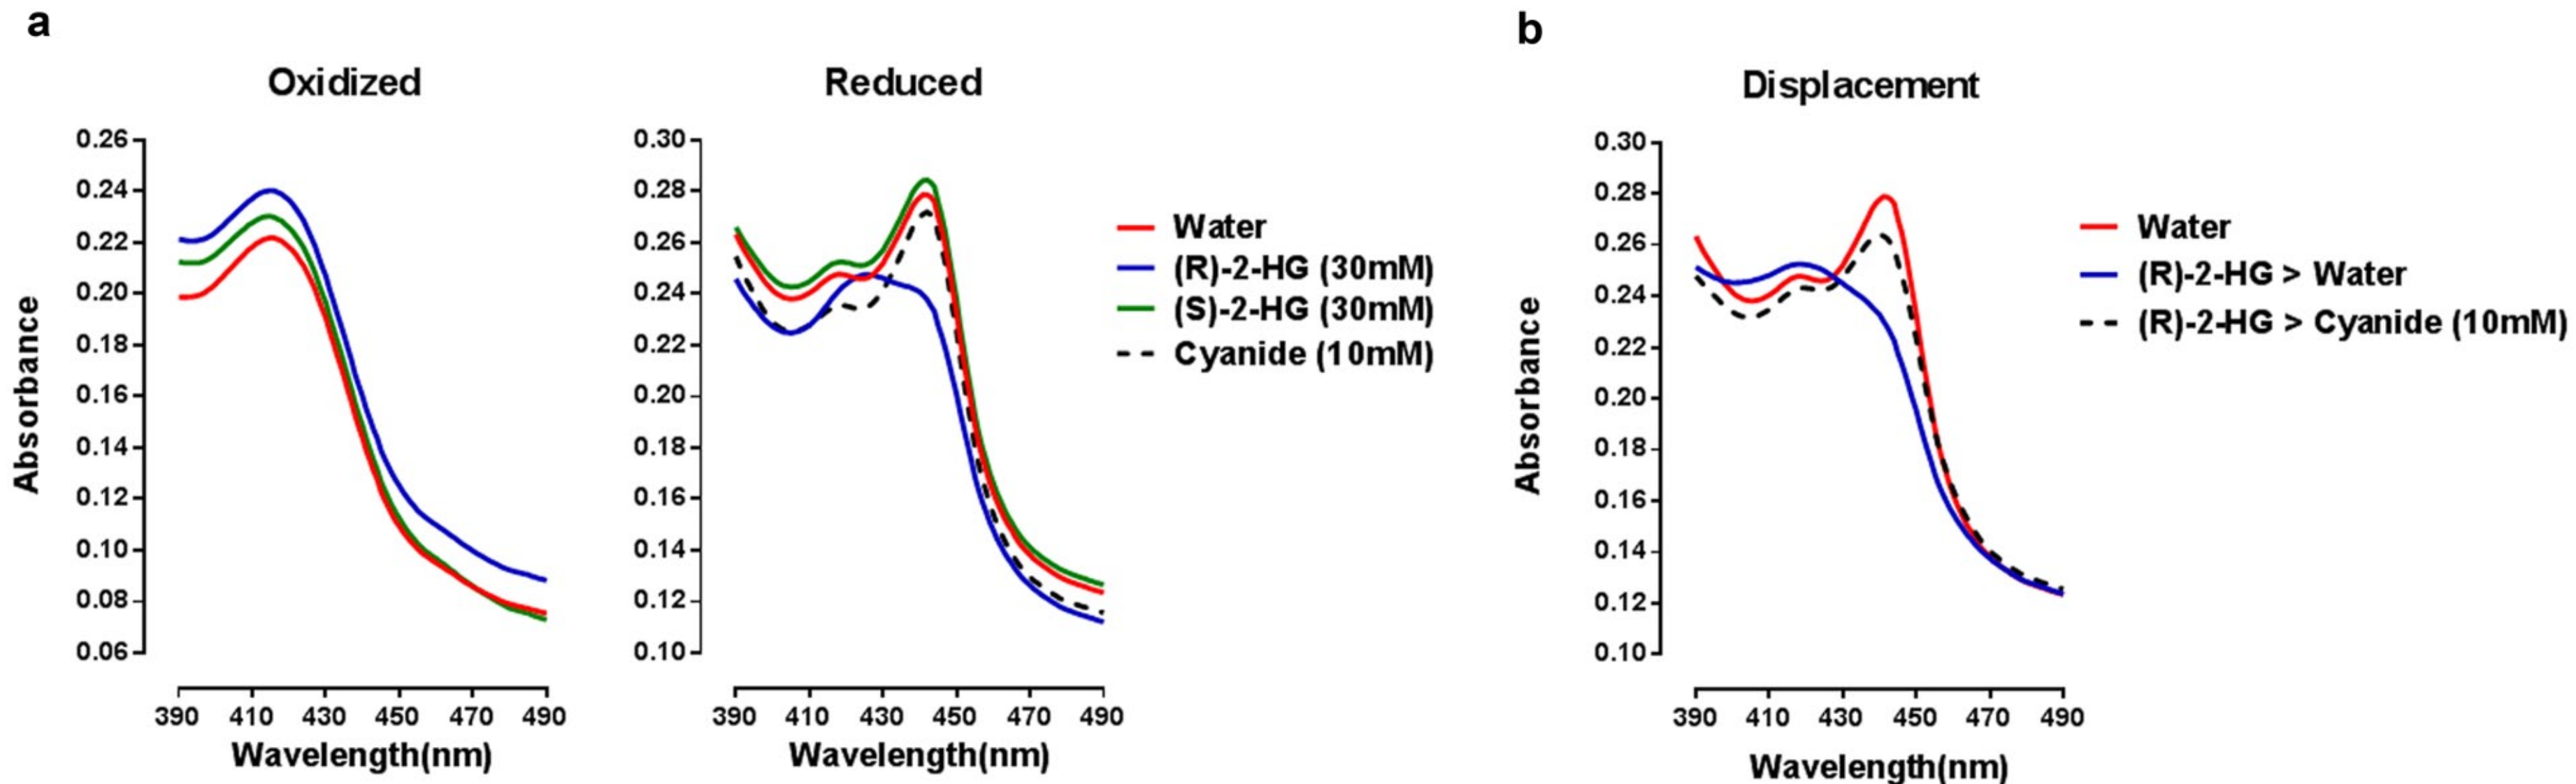

# Supplementary Figure 10

**a**

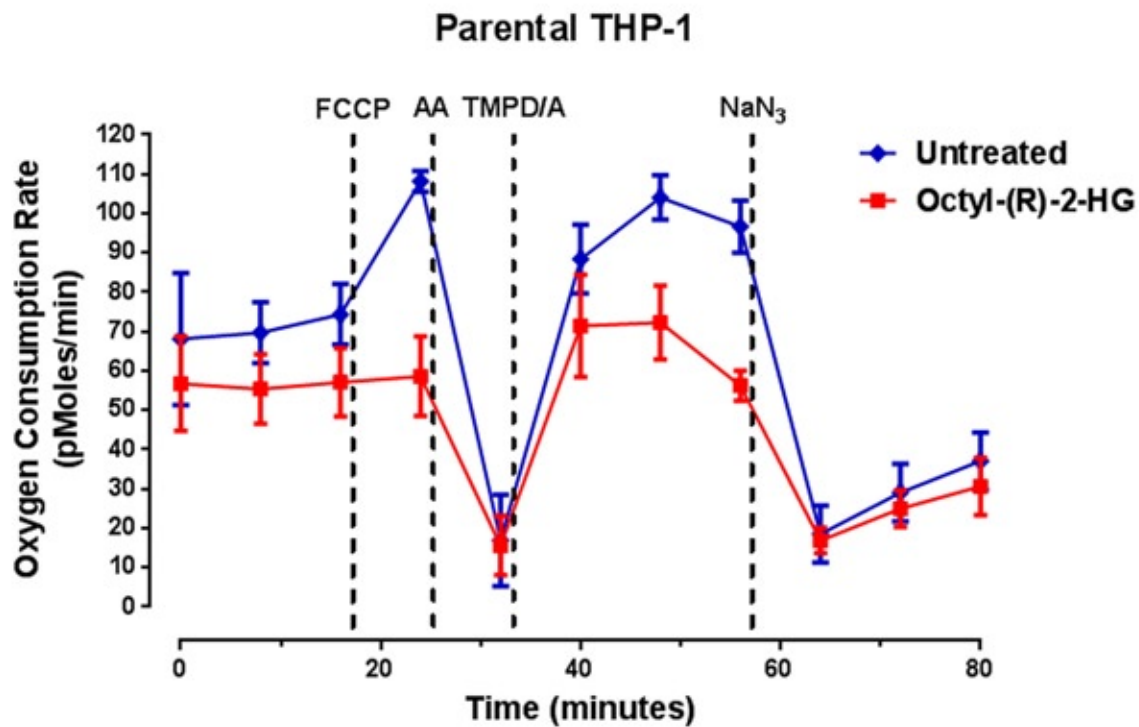

**b**

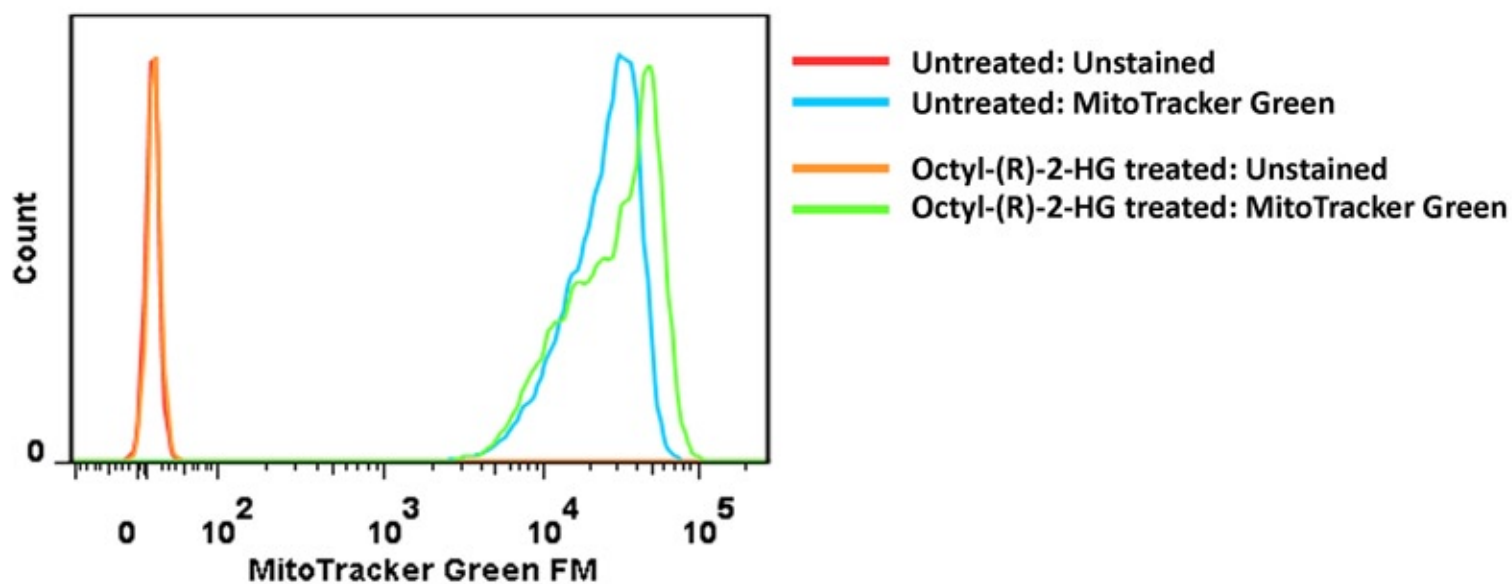

# Supplementary Figure 11

## AML Cell Lines

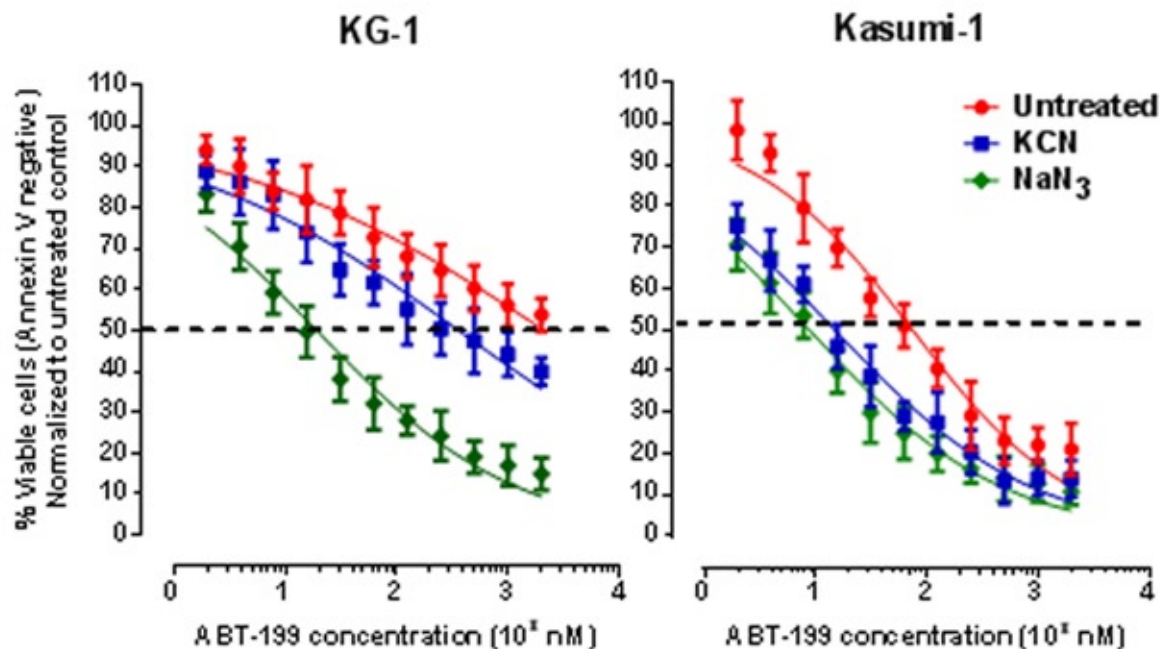

# Supplementary Figure 12

**a**

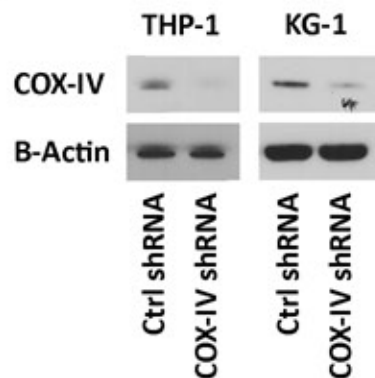

**b**

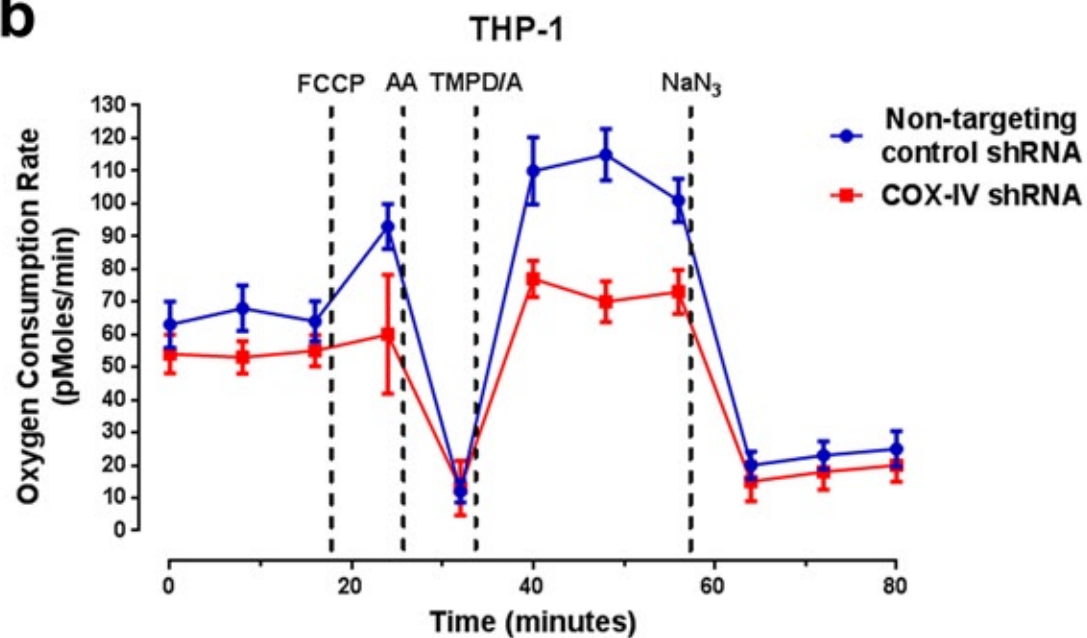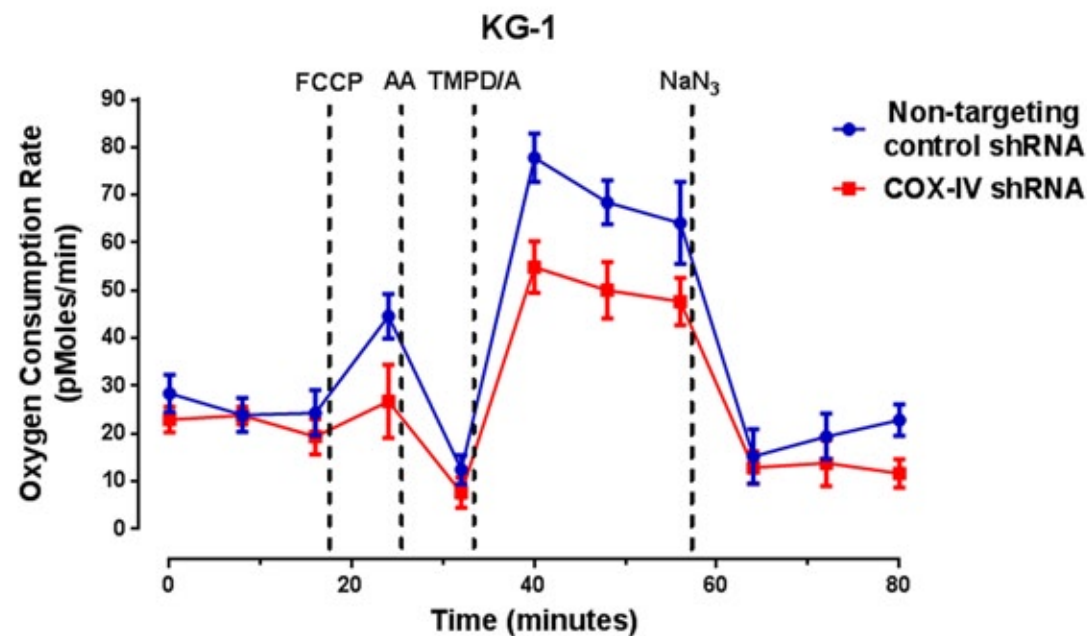

# Supplementary Figure 13

a

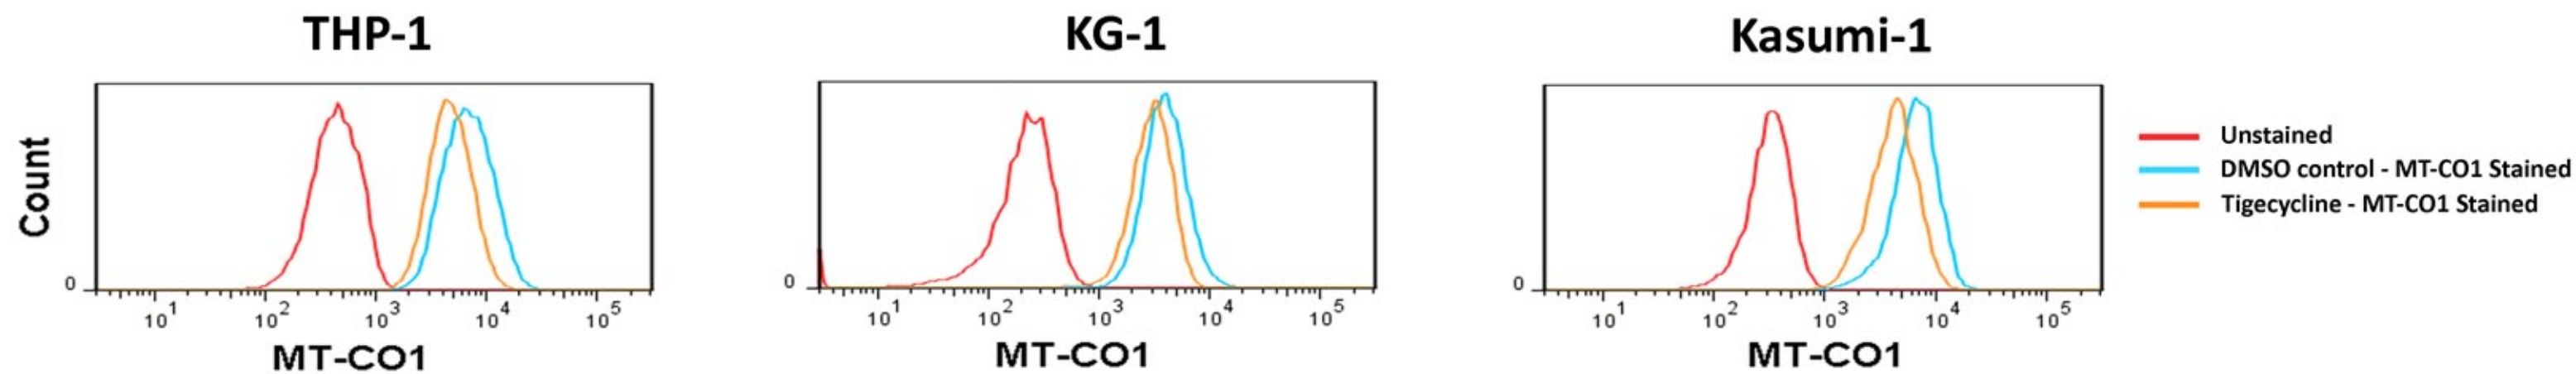

b

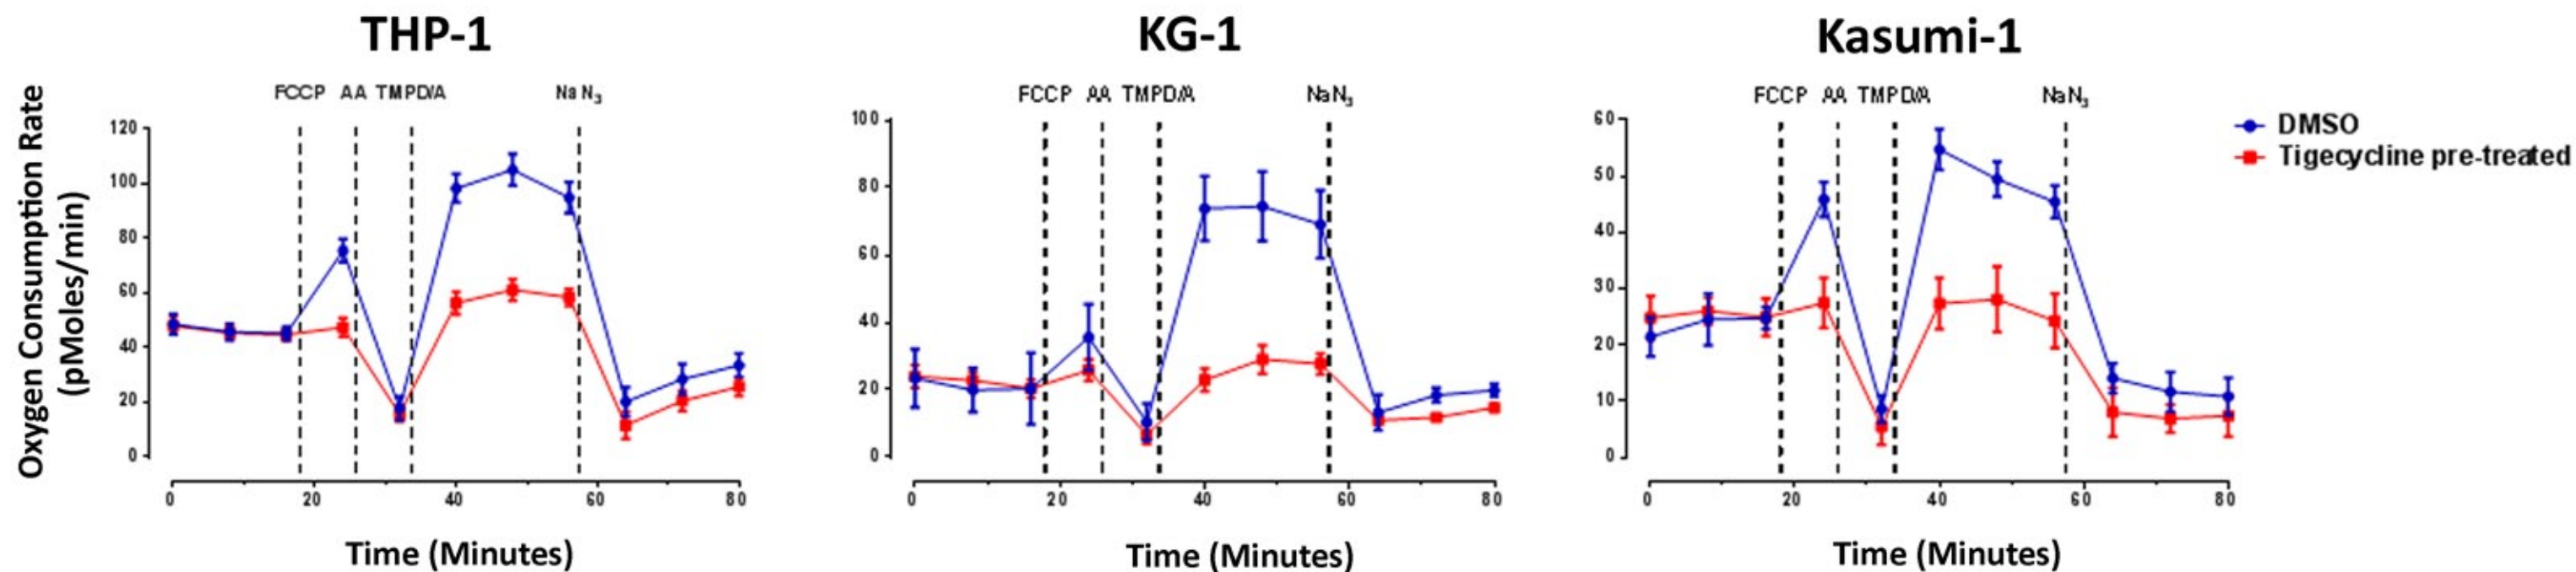

# Supplementary Figure 14

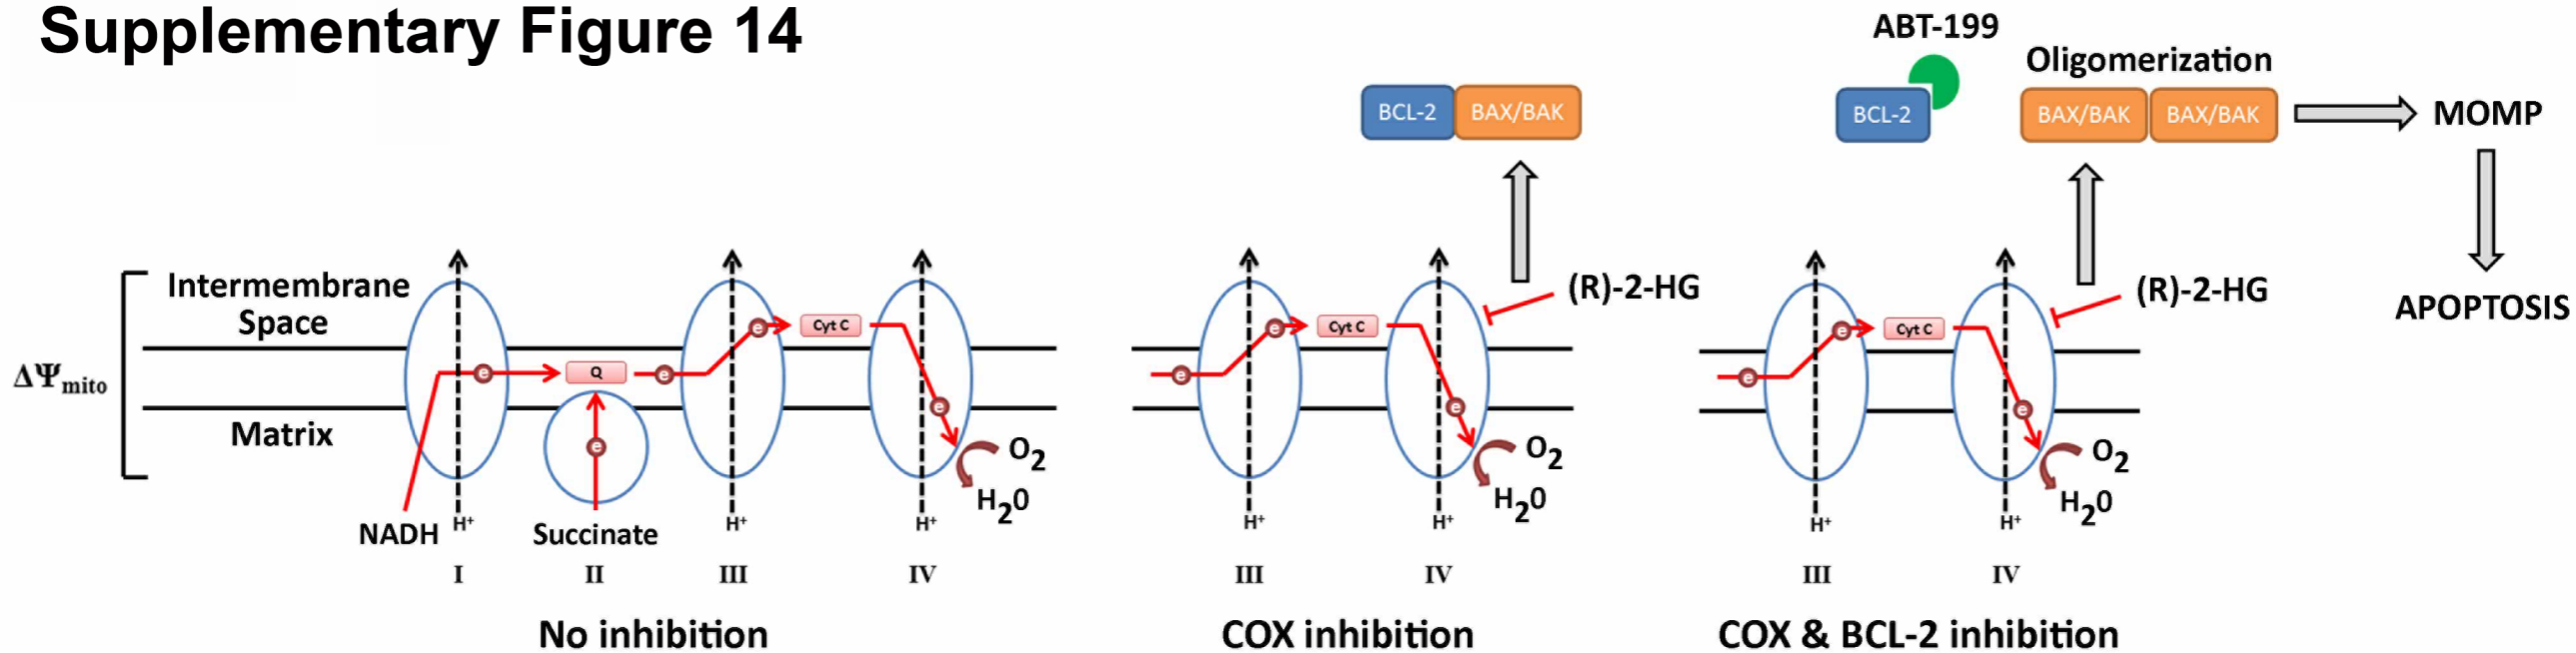

Supplementary Table 1

| Rank | Gene Symbol    | Gene Name                                                    | Number of redundant shRNA hits | Mean Dox/No Dox Ratio for IDH1 R132H (log <sub>10</sub> ) | Mean Dox/No Dox Ratio for IDH1 WT (log <sub>10</sub> ) |
|------|----------------|--------------------------------------------------------------|--------------------------------|-----------------------------------------------------------|--------------------------------------------------------|
| 1    | COQ5           | Coenzyme Q5 Homolog, Methyltransferase                       | 3                              | -0.480                                                    | 0.104                                                  |
| 2    | MDC1           | Mediator Of DNA-Damage Checkpoint 1                          | 3                              | -0.423                                                    | -0.079                                                 |
| 3    | BCL-W (BCL2L2) | BCL2-Like 2                                                  | 3                              | -0.414                                                    | -0.048                                                 |
| 4    | THBD           | Thrombomodulin                                               | 3                              | -0.407                                                    | 0.007                                                  |
| 5    | PLG            | Plasminogen                                                  | 4                              | -0.379                                                    | -0.092                                                 |
| 6    | CELSR1         | Cadherin, EGF LAG Seven-Pass G-Type Receptor 1               | 3                              | -0.357                                                    | -0.183                                                 |
| 7    | BCL2           | B-Cell CLL/Lymphoma 2                                        | 3                              | -0.344                                                    | -0.010                                                 |
| 8    | UBE2E1         | Ubiquitin-Conjugating Enzyme E2E 1                           | 3                              | -0.336                                                    | -0.082                                                 |
| 9    | SIN3A          | SIN3 Transcription Regulator Family Member                   | 4                              | -0.331                                                    | -0.032                                                 |
| 10   | NRIP1          | Nuclear Receptor Interacting Protein 1                       | 3                              | -0.320                                                    | 0.115                                                  |
| 11   | LDHAL6B        | Lactate Dehydrogenase A-Like 6B                              | 3                              | -0.314                                                    | -0.098                                                 |
| 12   | MMS19L         | MMS19 Nucleotide Excision Repair Homolog                     | 3                              | -0.314                                                    | 0.053                                                  |
| 13   | CACNA1B        | Calcium Channel, Voltage-Dependent, N Type, Alpha 1B Subunit | 3                              | -0.313                                                    | 0.022                                                  |
| 14   | PPP2R2A        | Protein Phosphatase 2, Regulatory Subunit B, Alpha           | 3                              | -0.308                                                    | -0.053                                                 |
| 15   | RAMP1          | Receptor (G Protein-Coupled) Activity Modifying Protein 1    | 3                              | -0.306                                                    | 0.109                                                  |



Supplementary Table 2

| Sample ID # | Age | Sex | Primary / Secondary | De novo / Primary refractory / Relapsed / Progression | WHO classification                         | Cytogenetics             | IDH1/2     | FLT3-ITD/TKD   | NPM1c    | ABT-199 IC <sub>50</sub> (nM) |
|-------------|-----|-----|---------------------|-------------------------------------------------------|--------------------------------------------|--------------------------|------------|----------------|----------|-------------------------------|
| SU277B      | 70  | F   | Primary             | Progression                                           | AML with myelodysplasia-related changes    | Normal                   | IDH1 R132G | Negative       | Negative | 3.774                         |
| SU291F      | 37  | F   | Primary             | Relapsed                                              | AML-not otherwise specified                | +8                       | IDH1 R132H | FLT3-TKD       | Positive | 0.09946                       |
| SU341       | 28  | M   | Primary             | De novo                                               | AML-not otherwise specified                | Normal                   | IDH1 R132C | Negative       | Negative | 0.1499                        |
| SU366B      | 75  | M   | Secondary from MDS  | Collected at time of AML diagnosis                    | AML with myelodysplasia-related changes    | Normal                   | IDH1 R132C | Negative       | Negative | 1.409                         |
| SU372       | 53  | F   | Primary             | De novo                                               | AML-not otherwise specified                | Normal                   | IDH1 R132H | FLT3-ITD + TKD | Positive | 0.648                         |
| SU419       | 78  | M   | Primary             | De novo                                               | AML-not otherwise specified                | Normal                   | IDH1 R132C | Negative       | Positive | 0.8342                        |
| SU430       | 46  | M   | Primary             | Primary refractory                                    | Mixed phenotype acute leukemia (B/myeloid) | der(7)t(7;11)            | IDH1 R132C | Negative       | Negative | 0.348                         |
| SU435B      | 76  | M   | Secondary from MDS  | Collected at time of AML diagnosis                    | AML with myelodysplasia-related changes    | +5,+8                    | IDH1 R132C | Negative       | Negative | 9.072                         |
| SU437       | 76  | F   | Secondary from CMML | Collected at time of AML diagnosis                    | AML with myelodysplasia-related changes    | Normal                   | IDH1 R132H | Negative       | Negative | 0.0855                        |
| SU492       | 73  | M   | Primary             | De novo                                               | AML-not otherwise specified                | +8                       | IDH1 R132C | FLT3-TKD       | Negative | 2.14                          |
| SU654       | 47  | M   | Primary             | De novo                                               | AML-not otherwise specified                | Normal                   | IDH1 R132C | Negative       | Positive | 0.7556                        |
| SU306       | 32  | F   | Primary             | De novo                                               | AML-not otherwise specified                | No analyzable metaphases | IDH2 R140Q | FLT3-TKD       | Positive | 4.576                         |

|        |    |   |                   |                                    |                                         |                   |            |          |          |        |
|--------|----|---|-------------------|------------------------------------|-----------------------------------------|-------------------|------------|----------|----------|--------|
| SU313  | 50 | F | Primary           | De novo                            | AML with myelodysplasia-related changes | Normal            | IDH2 R140Q | Negative | Negative | 0.1172 |
| SU339  | 58 | M | Primary           | De novo                            | AML with myelodysplasia-related changes | Normal            | IDH2 R172K | Negative | Negative | 4.217  |
| SU351  | 74 | M | Primary           | Relapsed                           | AML with myelodysplasia-related changes | der(10)t(X;10),+8 | IDH2 R140Q | Negative | Negative | 7.977  |
| SU424  | 39 | M | Primary           | De novo                            | AML with myelodysplasia-related changes | Normal            | IDH2 R140Q | Negative | Positive | 0.2892 |
| SU443  | 68 | M | Primary           | De novo                            | AML-not otherwise specified             | Normal            | IDH2 R140Q | FLT3-ITD | Positive | 11.63  |
| SU450B | 41 | M | Primary           | Relapsed                           | AML-not otherwise specified             | Normal            | IDH2 R140Q | FLT3-ITD | Positive | 37.58  |
| SU484  | 70 | F | Primary           | De novo                            | AML-not otherwise specified             | Normal            | IDH2 R140Q | Negative | Positive | 0.288  |
| SU496  | 24 | M | Primary           | Primary refractory                 | AML-not otherwise specified             | +6,+8,+11         | IDH2 R140Q | FLT3-TKD | Negative | 16.08  |
| SU572  | 73 | M | Secondary from PV | Collected at time of AML diagnosis | AML with myelodysplasia-related changes | Unknown           | IDH2 R140Q | Unknown  | Unknown  | 0.5574 |
| SU580  | 67 | M | Secondary from PV | Collected at time of AML diagnosis | AML with myelodysplasia-related changes | inv(9),-19,-22    | IDH2 R140Q | Negative | Negative | 2.525  |
| SU209  | 67 | F | Primary           | De novo                            | AML-not otherwise specified             | Normal            | Negative   | FLT3-ITD | Positive | 0.4541 |
| SU270  | 60 | F | Primary           | Relapsed                           | AML-not otherwise specified             | Normal            | Negative   | FLT3-ITD | Positive | 77.82  |
| SU325  | 59 | F | Primary           | De novo                            | AML-not otherwise specified             | Unknown           | Negative   | FLT3-ITD | Positive | 157    |
| SU353  | 65 | M | Primary           | De novo                            | AML-not otherwise specified             | Normal            | Negative   | FLT3-ITD | Positive | 33.45  |

|       |    |   |                    |                                    |                                         |                                                 |          |          |          |        |
|-------|----|---|--------------------|------------------------------------|-----------------------------------------|-------------------------------------------------|----------|----------|----------|--------|
| SU354 | 64 | M | Secondary from MDS | Collected at time of AML diagnosis | AML with myelodysplasia-related changes | Trisomy 19                                      | Negative | Negative | Negative | 5.568  |
| SU369 | 87 | M | Primary            | De novo                            | AML-not otherwise specified             | Unknown                                         | Negative | Negative | Negative | 5.016  |
| SU388 | 62 | M | Primary            | De novo                            | AML-not otherwise specified             | Normal                                          | Negative | FLT3-ITD | Negative | 23.12  |
| SU414 | 80 | F | Primary            | De novo                            | AML-not otherwise specified             | No analyzable metaphases                        | Negative | Negative | Positive | 50.62  |
| SU462 | 86 | F | Primary            | De novo                            | AML-not otherwise specified             | Unknown                                         | Negative | FLT3-ITD | Positive | 5.649  |
| SU463 | 56 | F | Primary            | De novo                            | AML with myelodysplasia-related changes | 57,XX,+X,+2,+10,+11,+12,+13,+14,+17,+20,+21,+22 | Negative | Negative | Negative | 24.75  |
| SU524 | 73 | M | Primary            | De novo                            | AML-not otherwise specified             | Normal                                          | Negative | Negative | Negative | 0.2813 |

---

Supplementary Table 3

| Wildtype IDH Samples |        |           |                                                                                       |                                                                                          |                                       |  |
|----------------------|--------|-----------|---------------------------------------------------------------------------------------|------------------------------------------------------------------------------------------|---------------------------------------|--|
| Sample ID            | Gender | Treatment | Baseline hCD45 <sup>+</sup><br>CD33 <sup>+</sup> CD19 <sup>-</sup><br>Engraftment (%) | Post-Treatment hCD45 <sup>+</sup> CD33 <sup>+</sup><br>CD19 <sup>-</sup> Engraftment (%) | Percent of<br>Baseline<br>Engraftment |  |
| SU325                | Male   | Mock      | 98.6                                                                                  | 95                                                                                       | 96                                    |  |
|                      | Female | Mock      | 93.4                                                                                  | 45.9                                                                                     | 49                                    |  |
|                      | Female | ABT-199   | 95                                                                                    | 55.1                                                                                     | 58                                    |  |
|                      | Male   | ABT-199   | 87.5                                                                                  | 2.35                                                                                     | 3                                     |  |
| SU353                | Female | Mock      | 99.2                                                                                  | 99.7                                                                                     | 101                                   |  |
|                      | Female | Mock      | 67.8                                                                                  | 81                                                                                       | 119                                   |  |
|                      | Female | Mock      | 98.3                                                                                  | 83.7                                                                                     | 85                                    |  |
|                      | Female | ABT-199   | 99.6                                                                                  | 9.19                                                                                     | 9                                     |  |
|                      | Female | ABT-199   | 98.5                                                                                  | 97.9                                                                                     | 99                                    |  |
|                      | Female | ABT-199   | 99.6                                                                                  | 84                                                                                       | 84                                    |  |
| SU354                | Male   | Mock      | 91                                                                                    | 86.6                                                                                     | 95                                    |  |
|                      | Male   | Mock      | 83.3                                                                                  | 74.6                                                                                     | 90                                    |  |
|                      | Male   | Mock      | 86                                                                                    | 93.2                                                                                     | 108                                   |  |
|                      | Male   | ABT-199   | 88.9                                                                                  | 80.8                                                                                     | 91                                    |  |
|                      | Male   | ABT-199   | 94.7                                                                                  | 64.4                                                                                     | 68                                    |  |
|                      | Male   | ABT-199   | 76.9                                                                                  | 78.2                                                                                     | 102                                   |  |
|                      | Male   | ABT-199   | 93                                                                                    | 83.4                                                                                     | 90                                    |  |
| SU463                | Female | Mock      | 98.9                                                                                  | 97.9                                                                                     | 99                                    |  |
|                      | Female | Mock      | 99                                                                                    | 98.4                                                                                     | 99                                    |  |
|                      | Female | Mock      | 98.7                                                                                  | 99.5                                                                                     | 101                                   |  |
|                      | Female | ABT-199   | 99.4                                                                                  | 95.3                                                                                     | 96                                    |  |
|                      | Female | ABT-199   | 99.2                                                                                  | 98.9                                                                                     | 100                                   |  |
|                      | Female | ABT-199   | 99.2                                                                                  | 98.2                                                                                     | 99                                    |  |

| Mutant IDH1 Samples |        |           |                                                                                       |                                                                                          |                                       |  |
|---------------------|--------|-----------|---------------------------------------------------------------------------------------|------------------------------------------------------------------------------------------|---------------------------------------|--|
| Sample ID           | Gender | Treatment | Baseline hCD45 <sup>+</sup><br>CD33 <sup>+</sup> CD19 <sup>-</sup><br>Engraftment (%) | Post-Treatment hCD45 <sup>+</sup> CD33 <sup>+</sup><br>CD19 <sup>-</sup> Engraftment (%) | Percent of<br>Baseline<br>Engraftment |  |
| SU430*              | Female | Mock      | 74.8                                                                                  | 83.3                                                                                     | 111                                   |  |
|                     | Female | Mock      | 99.2                                                                                  | 99.2                                                                                     | 100                                   |  |
|                     | Female | Mock      | 96                                                                                    | 97.1                                                                                     | 101                                   |  |
|                     | Female | Mock      | 91.9                                                                                  | 97.8                                                                                     | 106                                   |  |
|                     | Female | Mock      | 98.1                                                                                  | 98.9                                                                                     | 101                                   |  |
|                     | Female | ABT-199   | 97                                                                                    | 38.6                                                                                     | 40                                    |  |
|                     | Female | ABT-199   | 99.6                                                                                  | 31.1                                                                                     | 31                                    |  |

|               |        |         |      |      |     |
|---------------|--------|---------|------|------|-----|
|               | Female | ABT-199 | 91.8 | 42.2 | 46  |
|               | Female | ABT-199 | 94.3 | 13   | 14  |
|               | Female | ABT-199 | 95.1 | 5.92 | 6   |
| <b>SU372</b>  | Female | Mock    | 45.9 | 33.9 | 74  |
|               | Female | Mock    | 11   | 68.5 | 623 |
|               | Female | Mock    | 22.2 | 66.9 | 301 |
|               | Female | ABT-199 | 36.8 | 13.3 | 36  |
|               | Female | ABT-199 | 61.7 | 8.67 | 14  |
|               | Female | ABT-199 | 21.1 | 9.38 | 44  |
| <b>SU277B</b> | Male   | Mock    | 21.1 | 19.5 | 92  |
|               | Male   | ABT-199 | 23.1 | 1.4  | 6   |
| <b>SU437</b>  | Female | Mock    | 86.8 | 95   | 109 |
|               | Female | Mock    | 98.4 | 95.6 | 97  |
|               | Female | Mock    | 98.4 | 98.5 | 100 |
|               | Female | Mock    | 85.5 | 95.4 | 112 |
|               | Female | ABT-199 | 98.4 | 79.2 | 80  |
|               | Female | ABT-199 | 91.3 | 11.6 | 13  |
|               | Female | ABT-199 | 40   | 24.4 | 61  |
|               | Female | ABT-199 | 92.8 | 70.1 | 76  |
| <b>SU291F</b> | Female | Mock    | 85   | 88   | 104 |
|               | Female | Mock    | 71   | 85   | 120 |
|               | Female | Mock    | 96   | 95   | 99  |
|               | Female | Mock    | 94   | 85   | 90  |
|               | Female | ABT-199 | 77   | 22   | 29  |
|               | Female | ABT-199 | 78   | 12   | 15  |
|               | Female | ABT-199 | 97   | 8    | 8   |
|               | Female | ABT-199 | 61   | 45   | 74  |
|               | Female | ABT-199 | 97   | 22   | 23  |

\* SU430 is a mixed phenotype acute leukemia sample (B/myeloid) with variable CD33 and CD19 expression on blasts. Leukemic engraftment of SU430 was determined based on human CD45 expression alone.

**Supplementary Table 4**

| <b>Sample</b> | <b>Genotype</b> | <b>MT-CO1<br/>expression</b> | <b>COX<br/>activity</b> | <b>Normalized COX<br/>activity</b> |
|---------------|-----------------|------------------------------|-------------------------|------------------------------------|
| SU277B        | IDH1            | 22.69                        | 50                      | 2.22                               |
| SU291F        | IDH1            | 24.77                        | 168                     | 6.77                               |
| SU366         | IDH1            | 17.83                        | 119                     | 6.66                               |
| SU430         | IDH1            | 13.92                        | 51                      | 3.63                               |
| SU654         | IDH1            | 32.65                        | 114                     | 3.48                               |
| SU306         | IDH2            | 26.93                        | 153                     | 5.68                               |
| SU484         | IDH2            | 19.12                        | 22                      | 1.13                               |
| SU270         | WT              | 8.91                         | 107                     | 11.99                              |
| SU325         | WT              | 19.53                        | 145                     | 7.42                               |
| SU353         | WT              | 18.71                        | 175                     | 9.36                               |
| SU388         | WT              | 17.40                        | 80                      | 4.59                               |
| SU463         | WT              | 5.93                         | 50                      | 8.36                               |
| SU595         | WT              | 9.39                         | 109                     | 11.61                              |
| SU623         | WT              | 17.67                        | 131                     | 7.41                               |
